# Supplementary material for: Manual Therapy Improves Fibromyalgia Symptoms by Downregulating SIK1
Source: Preprints.org preprint supplement (doi:10.20944/preprints202408.0257.v1), 2024-08-05
Supplement: Supplementary file 1 [file supplementary]

## Sheet: FM1_Post_vs_Pre
Supplementary Table S4. Individual differentially expressed genes for FM1
Transcript	FM1_Post.value	FM1_Pre.value	Foldchange (Post/Pre)	log2foldchange	pvalue	significance	gene_id	gene_name	gene_description
ENST00000361763	182153	23.3198	7811.0876	2.96552	0.00375	TRUE	ENSG00000198851	CD3E	CD3e molecule [Source:HGNC Symbol
ENST00000397806	279549	37.2337	7507.9565	2.90842	5e-05	TRUE	ENSG00000188536	HBA2	hemoglobin subunit alpha 2 [Source:HGNC Symbol
ENST00000251595	80.1079	11.2743	7.1054	2.82891	0.0013	TRUE	ENSG00000188536	HBA2	hemoglobin subunit alpha 2 [Source:HGNC Symbol
TCONS_00154232	2.93574	0.445064	6.5962	2.72164	0.00025	TRUE	XLOC_070157	SYCY1	Syncytin-1
TCONS_00154234	5.0669	0.823167	6.1554	2.62185	0.00155	TRUE	XLOC_070158	CN165	Putative uncharacterized protein encoded by LINC00596
ENST00000320868	61.8646	10.2659	6.0262	2.59126	5e-05	TRUE	ENSG00000206172	HBA1	hemoglobin subunit alpha 1 [Source:HGNC Symbol
ENST00000327857	21.4035	3.82172	5.6005	2.48555	0.0035	TRUE	ENSG00000239839	DEFA3	defensin alpha 3 [Source:HGNC Symbol
ENST00000380299	10.9416	2.02714	5.3976	2.4323	0.00215	TRUE	ENSG00000223609	HBD	hemoglobin subunit delta [Source:HGNC Symbol
ENST00000330807	12.2262	2.29706	5.3225	2.41212	0.0038	TRUE	ENSG00000158578	ALAS2	5'-aminolevulinate synthase 2 [Source:HGNC Symbol
TCONS_00123410	1.44014	0.280969	5.1256	2.35773	0.0001	TRUE	ENSG00000235411	AC007041.2	developmentally regulated GTP binding protein 1 (DRG1) pseudogene
ENST00000392619	21533	44.0505	488.8253	-1.03261	0.00295	TRUE	ENSG00000186407	CD300E	CD300e molecule [Source:HGNC Symbol
ENST00000369448	28197	59.7533	471.8903	-1.08348	0.0043	TRUE	ENSG00000183508	FAM46C	terminal nucleotidyltransferase 5C [Source:HGNC Symbol
ENST00000259456	5.30119	1.12787	4.7002	2.23271	0.0006	TRUE	ENSG00000136929	HEMGN	hemogen [Source:HGNC Symbol
ENST00000262418	9.75503	2.27523	4.2875	2.10013	5e-05	TRUE	ENSG00000004939	SLC4A1	solute carrier family 4 member 1 (Diego blood group) [Source:HGNC Symbol
TCONS_00146222	0.5838	0.141243	4.1333	2.0473	5e-05	TRUE	XLOC_066624	LORF2	LINE-1 retrotransposable element ORF2 protein
ENST00000244741	12184	34.0337	357.9981	-1.48197	0.0016	TRUE	ENSG00000124762	CDKN1A	cyclin dependent kinase inhibitor 1A [Source:HGNC Symbol
TCONS_00018272	0.442702	0.112035	3.9515	1.98239	0.0008	TRUE	XLOC_008688	CX062	Putative uncharacterized protein encoded by LINC00269
TCONS_00067064	5.20343	1.33671	3.8927	1.96078	5e-05	TRUE	ENSG00000119714	GPR68	G protein-coupled receptor 68 [Source:HGNC Symbol
TCONS_00000621	1.0499	0.270316	3.8840	1.95754	0.00145	TRUE	XLOC_000259	GVQW1	Protein GVQW1
TCONS_00035020	0.819993	0.216766	3.7828	1.91947	5e-05	TRUE	XLOC_017379	CP089	UPF0764 protein C16orf89
ENST00000262094	6.54959	1.88797	3.4691	1.79457	0.00295	TRUE	ENSG00000041353	RAB27B	RAB27B
ENST00000500989	21.1998	6.52152	3.2507	1.70077	0.0013	TRUE	ENSG00000245164	LINC00861	long intergenic non-protein coding RNA 861 [Source:HGNC Symbol
ENST00000606017	6.60288	2.17304	3.0385	1.60338	0.004	TRUE	ENSG00000272398	CD24	CD24 molecule [Source:HGNC Symbol
TCONS_00119841	1.60728	0.529079	3.0379	1.60306	0.00055	TRUE	XLOC_053926	LORF2	LINE-1 retrotransposable element ORF2 protein
ENST00000474427	11684	43.4343	269.0040	-1.8943	0.00045	TRUE	ENSG00000118515	SGK1	serum/glucocorticoid regulated kinase 1 [Source:HGNC Symbol
ENST00000399220	101322	40.0363	2530.7533	1.33956	0.00165	TRUE	ENSG00000168329	CX3CR1	C-X3-C motif chemokine receptor 1 [Source:HGNC Symbol
ENST00000445132	10.4155	3.51269	2.9651	1.56809	0.00395	TRUE	ENSG00000121807	CCR2	C-C motif chemokine receptor 2 [Source:HGNC Symbol
ENST00000618589	181308	637.14	2.8456	-1.81317	5e-05	TRUE	ENSG00000276216	CH17-373J23.1	novel transcript
ENST00000307271	16.1698	5.91145	2.7353	1.45172	0.00025	TRUE	ENSG00000171115	GIMAP8	GTPase
TCONS_00010588	8.28856	3.09286	2.6799	1.42218	0.00115	TRUE	ENSG00000162722	TRIM58	tripartite motif containing 58 [Source:HGNC Symbol
ENST00000442253	5.22629	2.02529	2.5805	1.36766	0.00245	TRUE	ENSG00000170915	PAQR8	progestin and adipoQ receptor family member 8 [Source:HGNC Symbol
TCONS_00016490	2.41589	0.971421	2.4870	1.31438	0.00435	TRUE	ENSG00000277406	CH17-385C13.2	SEC22 homolog B4
ENST00000241261	19.1276	7.79021	2.4553	1.29592	0.0031	TRUE	ENSG00000121858	TNFSF10	TNF superfamily member 10 [Source:HGNC Symbol
ENST00000361264	18.7174	7.63972	2.4500	1.29279	0.0006	TRUE	ENSG00000198876	DCAF12	DDB1 and CUL4 associated factor 12 [Source:HGNC Symbol
TCONS_00114091	0.516476	1.08208	0.4773	-1.06703	0.0048	TRUE	ENSG00000223145	RN7SKP112	RNA
ENST00000377275	5.29437	12.0294	0.4401	-1.18404	0.00465	TRUE	ENSG00000165997	ARL5B	ADP ribosylation factor like GTPase 5B [Source:HGNC Symbol
ENST00000355085	24.2569	56.3254	0.4307	-1.21539	0.0014	TRUE	ENSG00000197405	C5AR1	complement C5a receptor 1 [Source:HGNC Symbol
TCONS_00061421	3.55859	8.82647	0.4032	-1.31053	0.0043	TRUE	ENSG00000139946	PELI2	pellino E3 ubiquitin protein ligase family member 2 [Source:HGNC Symbol
TCONS_00103574	1.95452	4.92756	0.3967	-1.33406	0.0031	TRUE	XLOC_047396	CP089	UPF0764 protein C16orf89
ENST00000371045	15.0076	39.2922	0.3819	-1.38855	0.0002	TRUE	ENSG00000184588	PDE4B	phosphodiesterase 4B [Source:HGNC Symbol
ENST00000260356	7.45029	19.9465	0.3735	-1.42077	0.0005	TRUE	ENSG00000137801	THBS1	thrombospondin 1 [Source:HGNC Symbol
TCONS_00019758	5.29951	14.2253	0.3725	-1.42453	0.00175	TRUE	ENSG00000143507	DUSP10	dual specificity phosphatase 10 [Source:HGNC Symbol
TCONS_00127753	0.314675	0.85497	0.3681	-1.44201	0.00325	TRUE	ENSG00000229781	AC013444.1	RRN3 RNA polymerase I transcription factor homolog (S. cerevisiae) (RRN3) pseudogene
TCONS_00096137	1.42045	3.8601	0.3680	-1.4423	0.0015	TRUE	ENSG00000178789	CD300LB	CD300 molecule like family member b [Source:HGNC Symbol
ENST00000264444	10.4854	29.1712	0.3594	-1.47616	0.00155	TRUE	ENSG00000059728	MXD1	MAX dimerization protein 1 [Source:HGNC Symbol
ENST00000259874	11.2443	31.3207	0.3590	-1.47792	0.001	TRUE	ENSG00000137331	IER3	immediate early response 3 [Source:HGNC Symbol
ENST00000239938	13.0835	36.4605	0.3588	-1.47859	0.00045	TRUE	ENSG00000120738	EGR1	early growth response 1 [Source:HGNC Symbol
TCONS_00023701	1.56136	4.45411	0.3505	-1.51233	0.00285	TRUE	ENSG00000108179	PPIF	peptidylprolyl isomerase F [Source:HGNC Symbol
TCONS_00009130	0.44345	1.31408	0.3375	-1.56721	0.0038	TRUE	ENSG00000274245	RP11-357P18.2	-
ENST00000241393	185962	556671	0.3341	-1.58182	0.0034	TRUE	ENSG00000121966	CXCR4	C-X-C motif chemokine receptor 4 [Source:HGNC Symbol
TCONS_00020696	4.16231	12.4946	0.3331	-1.58585	0.0015	TRUE	ENSG00000035687	ADSS	adenylosuccinate synthase [Source:HGNC Symbol
TCONS_00082754	1.1719	3.65893	0.3203	-1.64258	0.0047	TRUE	ENSG00000266758	MIR3680-2	microRNA 3680-2 [Source:HGNC Symbol
ENST00000296140	9.64997	30.7839	0.3135	-1.67358	5e-05	TRUE	ENSG00000163823	CCR1	C-C motif chemokine receptor 1 [Source:HGNC Symbol
TCONS_00160825	0.825893	2.65079	0.3116	-1.6824	0.0016	TRUE	ENSG00000124882	EREG	epiregulin [Source:HGNC Symbol
TCONS_00055635	8.03333	26.5946	0.3021	-1.72706	0.0002	TRUE	ENSG00000102760	RGCC	regulator of cell cycle [Source:HGNC Symbol
TCONS_00021251	0.363535	1.21299	0.2997	-1.7384	5e-05	TRUE	ENSG00000215244	RP11-563J2.2	-
TCONS_00140795	0.131343	0.455394	0.2884	-1.79377	0.00085	TRUE	XLOC_064132	CX062	Putative uncharacterized protein encoded by LINC00269
ENST00000602507	3.00071	10.4713	0.2866	-1.80306	0.0026	TRUE	ENSG00000270069	MIR222HG	miR222/221 cluster host gene [Source:HGNC Symbol
TCONS_00016231	9.6928	33.9607	0.2854	-1.80888	5e-05	TRUE	ENSG00000275538	RNVU1-19	RNA
TCONS_00207651	0.311819	1.10201	0.2830	-1.82136	0.0019	TRUE	ENSG00000154319	FAM167A	family with sequence similarity 167 member A [Source:HGNC Symbol
TCONS_00104514	0.429256	1.53529	0.2796	-1.8386	0.0033	TRUE	XLOC_047814	YG039	Putative uncharacterized protein FLJ38264
ENST00000256951	0.910303	3.29837	0.2760	-1.85733	0.00165	TRUE	ENSG00000134531	EMP1	epithelial membrane protein 1 [Source:HGNC Symbol
TCONS_00168213	0.398858	1.44771	0.2755	-1.85983	0.00225	TRUE	XLOC_077227	CX062	Putative uncharacterized protein encoded by LINC00269
TCONS_00206421	4.03491	14.6841	0.2748	-1.86365	0.00025	TRUE	ENSG00000253372	RP11-44N11.1	novel transcript
TCONS_00050023	0.910491	3.34623	0.2721	-1.87782	0.00245	TRUE	ENSG00000278743	RP11-707G18.1	novel transcript
ENST00000369155	10.3583	38.0988	0.2719	-1.87896	0.001	TRUE	ENSG00000184678	HIST2H2BE	histone cluster 2 H2B family member e [Source:HGNC Symbol
ENST00000449416	2.90579	10.7863	0.2694	-1.89219	0.0009	TRUE	ENSG00000130844	ZNF331	zinc finger protein 331 [Source:HGNC Symbol
ENST00000370626	1.62111	6.04088	0.2684	-1.89778	0.00345	TRUE	ENSG00000119986	AVPI1	arginine vasopressin induced 1 [Source:HGNC Symbol
TCONS_00008330	4.09129	15.2484	0.2683	-1.89803	0.00025	TRUE	ENSG00000090104	RGS1	regulator of G protein signaling 1 [Source:HGNC Symbol
TCONS_00090944	0.420198	1.59948	0.2627	-1.92846	0.0028	TRUE	XLOC_042180	CX062	Putative uncharacterized protein encoded by LINC00269
TCONS_00096162	0.219106	0.847191	0.2586	-1.95106	0.0021	TRUE	ENSG00000204345	CD300LD	CD300 molecule like family member d [Source:HGNC Symbol
TCONS_00006015	4.65642	18.5366	0.2512	-1.99309	5e-05	TRUE	ENSG00000273768	U1	-
TCONS_00019744	3.8075	15.1943	0.2506	-1.99661	0.0038	TRUE	ENSG00000143507	DUSP10	dual specificity phosphatase 10 [Source:HGNC Symbol
ENST00000367029	15.1774	60.8715	0.2493	-2.00384	0.0002	TRUE	ENSG00000123689	G0S2	G0/G1 switch 2 [Source:HGNC Symbol
TCONS_00128062	2.24778	9.08276	0.2475	-2.01463	5e-05	TRUE	ENSG00000136541	ERMN	ermin [Source:HGNC Symbol
ENST00000602540	0.885013	3.6395	0.2432	-2.03997	0.0025	TRUE	ENSG00000139289	PHLDA1	pleckstrin homology like domain family A member 1 [Source:HGNC Symbol
TCONS_00043547	0.17298	0.740668	0.2335	-2.09822	0.00085	TRUE	ENSG00000121335	PRB2	proline rich protein BstNI subfamily 2 [Source:HGNC Symbol
ENST00000311922	4.99441	21.3993	0.2334	-2.09918	0.00025	TRUE	ENSG00000173334	TRIB1	tribbles pseudokinase 1 [Source:HGNC Symbol
TCONS_00021248	0.892708	3.87003	0.2307	-2.11608	5e-05	TRUE	ENSG00000238366	Y_RNA	-
TCONS_00107217	2.24233	9.80712	0.2286	-2.12883	0.0011	TRUE	ENSG00000186431	FCAR	Fc fragment of IgA receptor [Source:HGNC Symbol
TCONS_00080460	0.0855159	0.374966	0.2281	-2.1325	0.00115	TRUE	XLOC_038180	UTY	Histone demethylase UTY
TCONS_00008327	3.96616	17.3986	0.2280	-2.13315	0.00295	TRUE	ENSG00000090104	RGS1	regulator of G protein signaling 1 [Source:HGNC Symbol
TCONS_00206630	3.02176	13.3856	0.2257	-2.14722	0.00205	TRUE	ENSG00000173334	TRIB1	tribbles pseudokinase 1 [Source:HGNC Symbol
TCONS_00136482	0.538586	2.39761	0.2246	-2.15435	5e-05	TRUE	ENSG00000124225	PMEPA1	prostate transmembrane protein
TCONS_00106316	4.78611	21.3572	0.2241	-2.15779	0.00315	TRUE	ENSG00000087074	PPP1R15A	protein phosphatase 1 regulatory subunit 15A [Source:HGNC Symbol
TCONS_00138521	4.31738	19.5385	0.2210	-2.17809	5e-05	TRUE	ENSG00000155307	SAMSN1	SAM domain
ENST00000624705	20.1524	92.3171	0.2183	-2.19565	5e-05	TRUE	ENSG00000279602	CTD-3014M21.1	TEC
ENST00000584923	47.3676	218.36	0.2169	-2.20474	5e-05	TRUE	ENSG00000263934	SNORD3A	small nucleolar RNA
ENST00000242480	1.88935	8.77279	0.2154	-2.21514	0.0009	TRUE	ENSG00000122877	EGR2	early growth response 2 [Source:HGNC Symbol
TCONS_00100621	0.880589	4.14073	0.2127	-2.23335	0.00165	TRUE	ENSG00000078043	PIAS2	protein inhibitor of activated STAT 2 [Source:HGNC Symbol
TCONS_00219379	1.21392	5.72983	0.2119	-2.23882	5e-05	TRUE	ENSG00000165029	ABCA1	ATP binding cassette subfamily A member 1 [Source:HGNC Symbol
TCONS_00180182	1.77219	8.71612	0.2033	-2.29815	0.00015	TRUE	ENSG00000112137	PHACTR1	phosphatase and actin regulator 1 [Source:HGNC Symbol
ENST00000340093	6.77038	34.0068	0.1991	-2.32852	0.00045	TRUE	ENSG00000011422	PLAUR	plasminogen activator
ENST00000371222	42.0268	211.69	0.1985	-2.33257	5e-05	TRUE	ENSG00000177606	JUN	Jun proto-oncogene
ENST00000222553	11.8681	61.6337	0.1926	-2.37663	5e-05	TRUE	ENSG00000105835	NAMPT	nicotinamide phosphoribosyltransferase [Source:HGNC Symbol
TCONS_00095301	17.4165	95.5574	0.1823	-2.45592	5e-05	TRUE	ENSG00000121101	TEX14	testis expressed 14
TCONS_00130667	1.34267	7.44752	0.1802	-2.47166	5e-05	TRUE	ENSG00000153823	PID1	phosphotyrosine interaction domain containing 1 [Source:HGNC Symbol
ENST00000566457	0.447952	2.49465	0.1796	-2.47742	0.00015	TRUE	ENSG00000261026	CTD-3247F14.2	novel transcript
TCONS_00180282	2.18685	12.6307	0.1731	-2.53001	0.00215	TRUE	ENSG00000201367	RNU6-522P	RNA
TCONS_00062377	1.23053	7.10927	0.1731	-2.53042	0.0015	TRUE	ENSG00000197555	SIPA1L1	signal induced proliferation associated 1 like 1 [Source:HGNC Symbol
ENST00000379775	5.64399	32.8022	0.1720	-2.53901	5e-05	TRUE	ENSG00000170525	PFKFB3	6-phosphofructo-2-kinase/fructose-2
ENST00000602478	4.74641	27.6338	0.1718	-2.54152	5e-05	TRUE	ENSG00000270022	RNU12	RNA
ENST00000372904	0.973164	5.71452	0.1703	-2.55388	0.00445	TRUE	ENSG00000124120	TTPAL	alpha tocopherol transfer protein like [Source:HGNC Symbol
TCONS_00208690	0.786947	4.79134	0.1642	-2.60609	0.001	TRUE	ENSG00000271938	RP11-589C21.6	novel transcript
ENST00000619086	1.31332	8.08204	0.1625	-2.6215	0.00475	TRUE	ENSG00000276900	RP11-467L13.7	novel transcript
TCONS_00090941	2.22843	14.1778	0.1572	-2.66954	5e-05	TRUE	ENSG00000261888	AC144831.1	novel transcript
TCONS_00092591	8.22105	54.0248	0.1522	-2.71623	0.00135	TRUE	ENSG00000261987	KYNUP1	kynureninase pseudogene 1 [Source:HGNC Symbol
TCONS_00091948	2.02926	13.4587	0.1508	-2.72952	5e-05	TRUE	ENSG00000179029	TMEM107	transmembrane protein 107 [Source:HGNC Symbol
ENST00000440465	1.17878	8.03718	0.1467	-2.7694	5e-05	TRUE	ENSG00000229644	NAMPTP1	nicotinamide phosphoribosyltransferase pseudogene 1 [Source:HGNC Symbol
TCONS_00176449	0.431331	2.97835	0.1448	-2.78765	5e-05	TRUE	ENSG00000248323	LUCAT1	lung cancer associated transcript 1 [Source:HGNC Symbol
TCONS_00002018	4.24159	29.5333	0.1436	-2.79967	5e-05	TRUE	ENSG00000229388	RP11-442N24__B.1	long intergenic non-protein coding RNA 1715 [Source:HGNC Symbol
ENST00000307407	23.1516	162.39	0.1426	-2.81028	5e-05	TRUE	ENSG00000169429	CXCL8	C-X-C motif chemokine ligand 8 [Source:HGNC Symbol
TCONS_00021083	0.207543	1.4562	0.1425	-2.81073	0.00145	TRUE	XLOC_010215	CP089	UPF0764 protein C16orf89
TCONS_00049471	0.213697	1.52463	0.1402	-2.83483	0.002	TRUE	ENSG00000173391	OLR1	oxidized low density lipoprotein receptor 1 [Source:HGNC Symbol
ENST00000513626	0.963597	7.08196	0.1361	-2.87765	0.0047	TRUE	ENSG00000248323	LUCAT1	lung cancer associated transcript 1 [Source:HGNC Symbol
ENST00000377103	0.791091	5.98127	0.1323	-2.91854	5e-05	TRUE	ENSG00000178726	THBD	thrombomodulin [Source:HGNC Symbol
ENST00000356917	1.23249	9.66726	0.1275	-2.97153	0.00225	TRUE	ENSG00000095794	CREM	cAMP responsive element modulator [Source:HGNC Symbol
TCONS_00214613	0.2713	2.2282	0.1218	-3.03792	0.00285	TRUE	ENSG00000119508	NR4A3	nuclear receptor subfamily 4 group A member 3 [Source:HGNC Symbol
TCONS_00069750	0.787571	6.58762	0.1196	-3.06428	5e-05	TRUE	ENSG00000103569	AQP9	aquaporin 9 [Source:HGNC Symbol
TCONS_00039308	3.55619	30.0123	0.1185	-3.07715	5e-05	TRUE	ENSG00000133316	WDR74	WD repeat domain 74 [Source:HGNC Symbol
TCONS_00054040	5.22421	44.3476	0.1178	-3.08557	5e-05	TRUE	ENSG00000202538	RNU4-2	RNA
TCONS_00205958	0.320443	2.92144	0.1096	-3.18854	5e-05	TRUE	ENSG00000169439	SDC2	syndecan 2 [Source:HGNC Symbol
TCONS_00117246	0.0718077	0.661868	0.1085	-3.20433	0.00425	TRUE	ENSG00000236969	GGT8P	gamma-glutamyltransferase 8 pseudogene [Source:HGNC Symbol
ENST00000230990	2.44655	22.7701	0.1074	-3.21832	0.0001	TRUE	ENSG00000113070	HBEGF	heparin binding EGF like growth factor [Source:HGNC Symbol
TCONS_00220483	0.122964	1.17031	0.1051	-3.25058	0.0047	TRUE	XLOC_104392	CX062	Putative uncharacterized protein encoded by LINC00269
TCONS_00099110	0.162415	1.68215	0.0966	-3.37255	5e-05	TRUE	ENSG00000197632	SERPINB2	serpin family B member 2 [Source:HGNC Symbol
ENST00000367468	0.782839	10.1602	0.0770	-3.69806	0.0036	TRUE	ENSG00000073756	PTGS2	prostaglandin-endoperoxide synthase 2 [Source:HGNC Symbol
TCONS_00202276	0.0677593	1.87654	0.0361	-4.79151	0.0024	TRUE	ENSG00000258227	CLEC5A	C-type lectin domain containing 5A [Source:HGNC Symbol
ENST00000335295	2591.06	461866	0.0056	2488	5e-05	TRUE	ENSG00000244734	HBB	hemoglobin subunit beta [Source:HGNC Symbol
ENST00000303004	44.1376	108035	0.0004	-1.29141	0.002	TRUE	ENSG00000172216	CEBPB	CCAAT enhancer binding protein beta [Source:HGNC Symbol
ENST00000369167	10.9727	26932	0.0004	-1.2954	0.00385	TRUE	ENSG00000203814	HIST2H2BF	histone cluster 2 H2B family member f [Source:HGNC Symbol
ENST00000436139	3.78906	13822	0.0003	-1.86705	0.0001	TRUE	ENSG00000138670	RASGEF1B	RasGEF domain family member 1B [Source:HGNC Symbol
ENST00000373313	14.9044	125213	0.0001	-3.07057	5e-05	TRUE	ENSG00000204103	MAFB	MAF bZIP transcription factor B [Source:HGNC Symbol
TCONS_00214111	0	0.383241	0.0000	-inf	0.0016	TRUE	XLOC_101006	-	-
ENST00000467738	0	0.48228	0.0000	-inf	0.00065	TRUE	ENSG00000168306	ACOX2	acyl-CoA oxidase 2 [Source:HGNC Symbol
ENST00000378569	0	1.10696	0.0000	-inf	0.0001	TRUE	ENSG00000108688	CCL7	C-C motif chemokine ligand 7 [Source:HGNC Symbol
ENST00000492446	0	5.08239	0.0000	-inf	5e-05	TRUE	ENSG00000241244	IGKV1D-16	immunoglobulin kappa variable 1D-16 [Source:HGNC Symbol
ENST00000420694	0	1.60935	0.0000	-inf	0.00225	TRUE	ENSG00000225039	LINC01058	long intergenic non-protein coding RNA 1058 [Source:HGNC Symbol
TCONS_00176729	0	4.11987	0.0000	-inf	0.0012	TRUE	XLOC_081732	LORF2	LINE-1 retrotransposable element ORF2 protein
ENST00000440904	0	1.58024	0.0000	-inf	5e-05	TRUE	ENSG00000236675	MTX1P1	metaxin 1 pseudogene 1 [Source:HGNC Symbol
ENST00000457720	0	1.88192	0.0000	-inf	5e-05	TRUE	ENSG00000230013	RP11-217B7.3	novel transcript
ENST00000505627	0	0.805309	0.0000	-inf	5e-05	TRUE	ENSG00000251127	RP11-280G9.1	novel transcript
ENST00000333674	0	0.772593	0.0000	-inf	0.0014	TRUE	ENSG00000174384	RP11-313P13.4	PMS1 homolog 2
TCONS_00165219	2.97171	0	inf	inf	0.00025	TRUE	XLOC_075690	-	-
ENST00000461022	0.443452	0	inf	inf	0.0048	TRUE	ENSG00000214784	AC010468.1	ribosomal protein S3A (RPS3A) pseudogene
ENST00000263621	0.616581	0	inf	inf	0.001	TRUE	ENSG00000197561	ELANE	elastase
TCONS_00161958	1.54481	0	inf	inf	0.00055	TRUE	ENSG00000138688	KIAA1109	KIAA1109 [Source:HGNC Symbol
ENST00000623278	0.739755	0	inf	inf	0.0016	TRUE	ENSG00000279741	RP11-44F14.9	novel transcript

## Sheet: FM2_Post_vs_Pre
Supplementary Table S4. Individual differentially expressed genes for FM2
Transcript	FM2_Post.value	FM2_Pre.value	Foldchange (Post/Pre)	log2foldchange	pvalue	significance	gene_id	gene_name	gene_description
ENST00000361763	134295	18.5193	7251.6240	2.8583	0.0014	TRUE	ENSG00000198851	CD3E	CD3e molecule [Source:HGNC Symbol
TCONS_00021083	1.53794	0.213022	7.2196	2.85193	0.00005	TRUE	XLOC_010215	CP089	UPF0764 protein C16orf89
ENST00000380876	1.18894	0.213248	5.5754	2.47907	0.00325	TRUE	ENSG00000205609	EIF3CL	eukaryotic translation initiation factor 3 subunit C like [Source:HGNC Symbol
ENST00000395124	10.6715	1.97537	5.4023	2.43357	0.0013	TRUE	ENSG00000134802	SLC43A3	solute carrier family 43 member 3 [Source:HGNC Symbol
TCONS_00123833	1.7501	0.348945	5.0154	2.32637	5e-05	TRUE	ENSG00000233862	AC016907.3	novel transcript
TCONS_00133608	17504	39.7491	440.3622	-1.18324	0.0036	TRUE	ENSG00000132819	RBM38	RNA binding motif protein 38 [Source:HGNC Symbol
ENST00000397806	165589	39.4544	4196.9717	2.06935	5e-05	TRUE	ENSG00000188536	HBA2	hemoglobin subunit alpha 2 [Source:HGNC Symbol
ENST00000294189	996182	206311	4.8285	2.27159	0.0013	TRUE	ENSG00000162244	RPL29	ribosomal protein L29 [Source:HGNC Symbol
ENST00000370132	1.75624	0.373719	4.6994	2.23246	0.00455	TRUE	ENSG00000137992	DBT	dihydrolipoamide branched chain transacylase E2 [Source:HGNC Symbol
ENST00000254806	42.3127	10.0707	4.2016	2.07093	0.00135	TRUE	ENSG00000132471	WBP2	WW domain binding protein 2 [Source:HGNC Symbol
ENST00000618589	243175	78.7179	3089.1957	1.62723	5e-05	TRUE	ENSG00000276216	CH17-373J23.1	novel transcript
TCONS_00106316	24.4036	6.30382	3.8712	1.95279	0.00285	TRUE	ENSG00000087074	PPP1R15A	protein phosphatase 1 regulatory subunit 15A [Source:HGNC Symbol
ENST00000390323	99.1422	29.2665	3.3876	1.76025	0.00395	TRUE	ENSG00000211677	IGLC2	immunoglobulin lambda constant 2 [Source:HGNC Symbol
TCONS_00038873	0.469904	0.13905	3.3794	1.75677	0.00445	TRUE	ENSG00000255151	GLYATL1P3	glycine-N-acyltransferase like 1B [Source:HGNC Symbol
ENST00000596288	9.85048	2.92394	3.3689	1.75228	0.0032	TRUE	ENSG00000112118	MCM3	minichromosome maintenance complex component 3 [Source:HGNC Symbol
ENST00000369167	21.4171	6.45917	3.3158	1.72934	0.0002	TRUE	ENSG00000203814	HIST2H2BF	histone cluster 2 H2B family member f [Source:HGNC Symbol
ENST00000340990	35.2408	11.4709	3.0722	1.61927	0.00265	TRUE	ENSG00000159346	ADIPOR1	adiponectin receptor 1 [Source:HGNC Symbol
TCONS_00036432	2.44059	0.803126	3.0389	1.60353	0.00025	TRUE	XLOC_017991	-	-
TCONS_00104514	1.11762	0.367959	3.0373	1.60282	0.0043	TRUE	XLOC_047814	YG039	Putative uncharacterized protein FLJ38264
ENST00000368141	106473	46.9917	2265.7831	1.18	0.00015	TRUE	ENSG00000163563	MNDA	myeloid cell nuclear differentiation antigen [Source:HGNC Symbol
ENST00000374550	1026.27	50.2624	20.4182	4.35178	0.0038	TRUE	ENSG00000142676	RPL11	ribosomal protein L11 [Source:HGNC Symbol
ENST00000375650	2.84831	0.970187	2.9358	1.55377	0.0038	TRUE	ENSG00000204388	HSPA1B	heat shock protein family A (Hsp70) member 1B [Source:HGNC Symbol
TCONS_00016231	76.1031	26.1414	2.9112	1.54162	5e-05	TRUE	ENSG00000275538	RNVU1-19	RNA
TCONS_00050023	3.71403	1.35675	2.7374	1.45284	0.00265	TRUE	ENSG00000278743	RP11-707G18.1	novel transcript
ENST00000399220	59.2876	23.1944	2.5561	1.35395	0.0001	TRUE	ENSG00000168329	CX3CR1	C-X3-C motif chemokine receptor 1 [Source:HGNC Symbol
ENST00000300231	2.96334	1.18276	2.5054	1.32507	0.001	TRUE	ENSG00000166963	MAP1A	microtubule associated protein 1A [Source:HGNC Symbol
ENST00000311597	4.41226	1.80339	2.4466	1.29081	0.00455	TRUE	ENSG00000100427	MLC1	megalencephalic leukoencephalopathy with subcortical cysts 1 [Source:HGNC Symbol
ENST00000361739	951152	410921	2.3147	1.21082	0.00015	TRUE	ENSG00000198712	MT-CO2	mitochondrially encoded cytochrome c oxidase II [Source:HGNC Symbol
ENST00000371222	201.17	87.6547	2.2950	1.19851	0.0006	TRUE	ENSG00000177606	JUN	Jun proto-oncogene
ENST00000390545	83.5089	37.1112	2.2502	1.17007	0.00105	TRUE	ENSG00000211893	IGHG2	immunoglobulin heavy constant gamma 2 (G2m marker) [Source:HGNC Symbol
TCONS_00006015	13.5474	6.02215	2.2496	1.16967	0.001	TRUE	ENSG00000273768	U1	-
ENST00000305218	18.9673	8.70903	2.1779	1.12293	0.00295	TRUE	ENSG00000168439	STIP1	stress induced phosphoprotein 1 [Source:HGNC Symbol
ENST00000307271	22.3906	11.0186	2.0321	1.02294	0.0019	TRUE	ENSG00000171115	GIMAP8	GTPase
TCONS_00002018	26.1347	13.0141	2.0082	1.00589	0.00215	TRUE	ENSG00000229388	RP11-442N24__B.1	long intergenic non-protein coding RNA 1715 [Source:HGNC Symbol
TCONS_00207753	1.84087	3.69956	0.4976	-1.00697	0.005	TRUE	ENSG00000154359	LONRF1	LON peptidase N-terminal domain and ring finger 1 [Source:HGNC Symbol
TCONS_00103574	2.10357	4.44845	0.4729	-1.08047	0.0028	TRUE	XLOC_047396	CP089	UPF0764 protein C16orf89
TCONS_00206421	4.46335	9.64234	0.4629	-1.11126	0.0049	TRUE	ENSG00000253372	RP11-44N11.1	novel transcript
TCONS_00156226	0.504915	1.12629	0.4483	-1.15746	0.0017	TRUE	XLOC_071233	CX062	Putative uncharacterized protein encoded by LINC00269
TCONS_00036830	1.25215	2.8392	0.4410	-1.18108	0.00125	TRUE	XLOC_018143	CX062	Putative uncharacterized protein encoded by LINC00269
TCONS_00090941	1.25099	2.89118	0.4327	-1.20859	0.0033	TRUE	ENSG00000261888	AC144831.1	novel transcript
TCONS_00160485	0.35641	0.838741	0.4249	-1.23469	0.00415	TRUE	ENSG00000269949	RP11-738E22.3	novel transcript
TCONS_00059631	1.35764	3.22885	0.4205	-1.24992	0.00315	TRUE	ENSG00000139832	RAB20	RAB20
TCONS_00148155	1.10155	2.63086	0.4187	-1256	0.0028	TRUE	ENSG00000168386	FILIP1L	filamin A interacting protein 1 like [Source:HGNC Symbol
TCONS_00193677	0.612471	1.47084	0.4164	-1.26393	0.00225	TRUE	ENSG00000198039	ZNF273	zinc finger protein 273 [Source:HGNC Symbol
TCONS_00127753	0.226345	0.546822	0.4139	-1.27255	0.00435	TRUE	ENSG00000229781	AC013444.1	RRN3 RNA polymerase I transcription factor homolog (S. cerevisiae) (RRN3) pseudogene
TCONS_00154127	2.9108	7.04548	0.4131	-1.27528	0.0011	TRUE	ENSG00000272305	RP11-894J14.5	novel transcript
TCONS_00046945	1.76206	4.31043	0.4088	-1.29057	0.0037	TRUE	ENSG00000111142	METAP2	methionyl aminopeptidase 2 [Source:HGNC Symbol
ENST00000288943	37.7103	93.3412	0.4040	-1.30756	0.0014	TRUE	ENSG00000158050	DUSP2	dual specificity phosphatase 2 [Source:HGNC Symbol
TCONS_00077635	0.298253	0.752337	0.3964	-1.33484	0.00325	TRUE	XLOC_037081	CX062	Putative uncharacterized protein encoded by LINC00269
TCONS_00139487	2.27468	5.88331	0.3866	-1.37097	0.0005	TRUE	ENSG00000173276	ZBTB21	zinc finger and BTB domain containing 21 [Source:HGNC Symbol
TCONS_00103207	0.578328	1.50254	0.3849	-1.37744	0.00415	TRUE	ENSG00000270802	AC005776.1	ribosomal protein L21 (RPL21) pseudogene
TCONS_00073489	0.455873	1.24631	0.3658	-1.45096	0.0001	TRUE	XLOC_035429	LORF2	LINE-1 retrotransposable element ORF2 protein
TCONS_00061372	2.30496	6.31007	0.3653	-1.45291	0.0038	TRUE	ENSG00000178974	FBXO34	F-box protein 34 [Source:HGNC Symbol
TCONS_00214611	0.939918	2.62964	0.3574	-1.48426	0.00215	TRUE	ENSG00000119508	NR4A3	nuclear receptor subfamily 4 group A member 3 [Source:HGNC Symbol
ENST00000613488	4.84023	13.7978	0.3508	-1.51129	5e-05	TRUE	ENSG00000275993	CH507-42P11.8	salt inducible kinase 1B (putative) [Source:HGNC Symbol
TCONS_00211634	0.126868	0.361761	0.3507	-1.51171	0.00445	TRUE	ENSG00000254008	LINC00051	long intergenic non-protein coding RNA 51 [Source:HGNC Symbol
ENST00000430350	12.0032	34.3813	0.3491	-1.5182	0.0046	TRUE	ENSG00000171867	PRNP	prion protein [Source:HGNC Symbol
TCONS_00036836	1.35322	3.97694	0.3403	-1.55526	0.00075	TRUE	ENSG00000184545	DUSP8	dual specificity phosphatase 8 [Source:HGNC Symbol
TCONS_00132414	0.159232	0.485742	0.3278	-1.60906	0.0026	TRUE	ENSG00000225246	RPS2P1	ribosomal protein S2 pseudogene 1 [Source:HGNC Symbol
TCONS_00191052	1.56476	5.00961	0.3124	-1.67875	0.00495	TRUE	ENSG00000215712	TMEM242	transmembrane protein 242 [Source:HGNC Symbol
TCONS_00214157	0.528283	1.71044	0.3089	-1.69498	0.00085	TRUE	XLOC_101039	-	-
TCONS_00185111	4.11827	13.5251	0.3045	-1.71553	5e-05	TRUE	ENSG00000130340	SNX9	sorting nexin 9 [Source:HGNC Symbol
TCONS_00080500	2.41932	8.07499	0.2996	-1.73886	0.0001	TRUE	ENSG00000263456	MIR5189	microRNA 5189 [Source:HGNC Symbol
ENST00000242480	1.49169	5.07864	0.2937	-1.7675	0.0013	TRUE	ENSG00000122877	EGR2	early growth response 2 [Source:HGNC Symbol
TCONS_00085011	0.731772	2.58129	0.2835	-1.81863	0.00105	TRUE	ENSG00000103257	SLC7A5	solute carrier family 7 member 5 [Source:HGNC Symbol
TCONS_00085016	2.04437	7.57674	0.2698	-1.88992	0.00205	TRUE	ENSG00000103257	SLC7A5	solute carrier family 7 member 5 [Source:HGNC Symbol
ENST00000230990	3.10214	11.5369	0.2689	-1.89492	0.0001	TRUE	ENSG00000113070	HBEGF	heparin binding EGF like growth factor [Source:HGNC Symbol
TCONS_00097120	1.57332	6.25637	0.2515	-1.99151	0.00205	TRUE	ENSG00000169710	FASN	fatty acid synthase [Source:HGNC Symbol
TCONS_00214613	0.294921	1.2198	0.2418	-2.04824	0.0044	TRUE	ENSG00000119508	NR4A3	nuclear receptor subfamily 4 group A member 3 [Source:HGNC Symbol
TCONS_00121076	0.34666	1.46605	0.2365	-2.08034	0.00175	TRUE	ENSG00000204186	ZDBF2	zinc finger DBF-type containing 2 [Source:HGNC Symbol
TCONS_00208342	0.285508	1.30263	0.2192	-2.18982	5e-05	TRUE	ENSG00000120875	DUSP4	dual specificity phosphatase 4 [Source:HGNC Symbol
TCONS_00095761	0.651273	3.27484	0.1989	-2.33009	0.0015	TRUE	ENSG00000176809	LRRC37A3	leucine rich repeat containing 37 member A3 [Source:HGNC Symbol
ENST00000367029	7.6243	39.5028	0.1930	-2.37328	5e-05	TRUE	ENSG00000123689	G0S2	G0/G1 switch 2 [Source:HGNC Symbol
TCONS_00049471	0.26395	1.37415	0.1921	-2.38021	0.00075	TRUE	ENSG00000173391	OLR1	oxidized low density lipoprotein receptor 1 [Source:HGNC Symbol
TCONS_00160829	0.340407	1.94352	0.1751	-2.51334	0.0014	TRUE	ENSG00000109321	AREG	amphiregulin [Source:HGNC Symbol
ENST00000376112	1.3266	7.79911	0.1701	-2.55558	0.0025	TRUE	ENSG00000125968	ID1	inhibitor of DNA binding 1
TCONS_00205958	0.132198	0.782916	0.1689	-2.56616	5e-05	TRUE	ENSG00000169439	SDC2	syndecan 2 [Source:HGNC Symbol
TCONS_00184898	0.45956	3.85666	0.1192	-3.06903	5e-05	TRUE	ENSG00000120278	PLEKHG1	pleckstrin homology and RhoGEF domain containing G1 [Source:HGNC Symbol
TCONS_00216253	0.0441202	0.41433	0.1065	-3.23127	0.0037	TRUE	XLOC_102121	CN165	Putative uncharacterized protein encoded by LINC00596
ENST00000362079	1829.55	818576	0.0022	1.1603	0.00405	TRUE	ENSG00000198938	MT-CO3	mitochondrially encoded cytochrome c oxidase III [Source:HGNC Symbol
ENST00000239938	20.6374	72195	0.0003	-1.80664	5e-05	TRUE	ENSG00000120738	EGR1	early growth response 1 [Source:HGNC Symbol
TCONS_00177917	1.25579	4717	0.0003	-1.90928	0.00035	TRUE	ENSG00000113070	HBEGF	heparin binding EGF like growth factor [Source:HGNC Symbol
ENST00000508832	0	88.4644	0.0000	-inf	0.00055	TRUE	ENSG00000251562	MALAT1	metastasis associated lung adenocarcinoma transcript 1 [Source:HGNC Symbol
TCONS_00162809	1.06833	0	inf	inf	0.00125	TRUE	XLOC_074366	-	-
TCONS_00213086	0.487091	0	inf	inf	0.00355	TRUE	XLOC_100408	-	-
TCONS_00113824	0.382627	0	inf	inf	0.00375	TRUE	XLOC_051003	-	-
TCONS_00197442	0.434126	0	inf	inf	0.00135	TRUE	ENSG00000223872	AC006372.5	novel transcript
ENST00000510551	0.500946	0	inf	inf	0.00085	TRUE	ENSG00000249241	AC195454.1	long intergenic non-protein coding RNA 2265 [Source:HGNC Symbol
ENST00000609028	0.877287	0	inf	inf	0.00195	TRUE	ENSG00000272663	RP11-191L17.1	novel transcript
ENST00000446167	1.51736	0	inf	inf	0.00145	TRUE	ENSG00000237950	RP11-7O11.3	novel transcript
ENST00000621150	14.9393	0	inf	inf	5e-05	TRUE	ENSG00000118503	TNFAIP3	TNF alpha induced protein 3 [Source:HGNC Symbol
TCONS_00081264	0.773618	0	inf	inf	0.00025	TRUE	XLOC_038432	YS049	Zinc finger protein ENSP00000375192

## Sheet: FM3_Post_vs_Pre
Supplementary Table S4. Individual differentially expressed genes for FM3
Transcript	FM3_Post.value	FM3_Pre.value	Foldchange (Post/Pre)	log2foldchange	pvalue	significance	gene_id	gene_name	gene_description
ENST00000005178	11.4048	1.50174	7.5944	2.92494	5e-05	TRUE	ENSG00000004799	PDK4	pyruvate dehydrogenase kinase 4 [Source:HGNC Symbol
ENST00000324170	4.25322	0.665973	6.3865	2.67502	0.00405	TRUE	ENSG00000155329	ZCCHC10	zinc finger CCHC-type containing 10 [Source:HGNC Symbol
ENST00000335295	419343	1040.47	403.0323	-1.31103	5e-05	TRUE	ENSG00000244734	HBB	hemoglobin subunit beta [Source:HGNC Symbol
TCONS_00003611	2.14459	0.446883	4.7990	2.26273	0.0029	TRUE	ENSG00000134709	HOOK1	hook microtubule tethering protein 1 [Source:HGNC Symbol
TCONS_00103849	1.53995	0.357423	4.3085	2.10718	0.003	TRUE	ENSG00000256771	ZNF253	zinc finger protein 253 [Source:HGNC Symbol
TCONS_00196393	0.632761	0.175512	3.6052	1.85009	0.0021	TRUE	ENSG00000230649	AC024084.1	novel transcript
TCONS_00127097	3.63343	1.02003	3.5621	1.83272	5e-05	TRUE	ENSG00000125538	IL1B	interleukin 1 beta [Source:HGNC Symbol
TCONS_00138101	2.79877	0.837485	3.3419	1.74066	0.00475	TRUE	ENSG00000142185	TRPM2	transient receptor potential cation channel subfamily M member 2 [Source:HGNC Symbol
ENST00000361763	113187	34526	3.2783	1.71295	0.00155	TRUE	ENSG00000198851	CD3E	CD3e molecule [Source:HGNC Symbol
TCONS_00127092	9.09106	2.77523	3.2758	1.71184	0.0016	TRUE	ENSG00000125538	IL1B	interleukin 1 beta [Source:HGNC Symbol
TCONS_00008838	4.54937	1.40067	3.2480	1.69955	0.00395	TRUE	ENSG00000122188	LAX1	lymphocyte transmembrane adaptor 1 [Source:HGNC Symbol
ENST00000564243	7.27918	2.27298	3.2025	1.67919	5e-05	TRUE	ENSG00000184110	EIF3C	eukaryotic translation initiation factor 3 subunit C [Source:HGNC Symbol
ENST00000295683	2.03743	0.641683	3.1751	1.66682	0.00305	TRUE	ENSG00000163464	CXCR1	C-X-C motif chemokine receptor 1 [Source:HGNC Symbol
ENST00000367721	5.17495	1.66001	3.1174	1.64035	0.00025	TRUE	ENSG00000117560	FASLG	Fas ligand [Source:HGNC Symbol
TCONS_00073127	1.38604	0.455101	3.0456	1.60671	0.00425	TRUE	ENSG00000138606	SHF	Src homology 2 domain containing F [Source:HGNC Symbol
ENST00000399220	94239	39.5157	2384.8496	1.2539	5e-05	TRUE	ENSG00000168329	CX3CR1	C-X3-C motif chemokine receptor 1 [Source:HGNC Symbol
ENST00000445132	28126	13.8857	2025.5371	1.0183	0.00365	TRUE	ENSG00000121807	CCR2	C-C motif chemokine receptor 2 [Source:HGNC Symbol
TCONS_00015364	60.9791	20.4527	2.9815	1.57602	0.00375	TRUE	ENSG00000137970	RPL7P9	ribosomal protein L7 pseudogene 9 [Source:HGNC Symbol
TCONS_00140069	0.603597	0.225318	2.6789	1.42162	0.0046	TRUE	ENSG00000236499	LINC00896	long intergenic non-protein coding RNA 896 [Source:HGNC Symbol
TCONS_00119110	1.35002	0.538363	2.5076	1.32633	5e-05	TRUE	XLOC_053592	-	-
TCONS_00197729	0.815976	0.344477	2.3687	1.24412	0.00045	TRUE	ENSG00000228334	AC024028.1	novel transcript
TCONS_00034693	1.51126	0.669522	2.2572	1.17455	0.00175	TRUE	ENSG00000246067	RAB30-AS1	RAB30 antisense RNA 1 (head to head) [Source:HGNC Symbol
ENST00000320316	10.1313	4.52736	2.2378	1.16208	0.00405	TRUE	ENSG00000040633	PHF23	PHD finger protein 23 [Source:HGNC Symbol
TCONS_00012072	0.914136	0.446115	2.0491	1.03499	0.00445	TRUE	ENSG00000261326	LINC01355	long intergenic non-protein coding RNA 1355 [Source:HGNC Symbol
ENST00000377126	9.11938	18.9336	0.4817	-1.05394	0.00105	TRUE	ENSG00000119138	KLF9	Kruppel like factor 9 [Source:HGNC Symbol
TCONS_00036830	1.31286	2.73786	0.4795	-1.06033	0.0045	TRUE	XLOC_018143	CX062	Putative uncharacterized protein encoded by LINC00269
ENST00000375856	9.4406	19.7829	0.4772	-1.06731	0.00165	TRUE	ENSG00000185950	IRS2	insulin receptor substrate 2 [Source:HGNC Symbol
ENST00000241393	142302	300548	0.4735	-1.07864	0.00035	TRUE	ENSG00000121966	CXCR4	C-X-C motif chemokine receptor 4 [Source:HGNC Symbol
ENST00000613488	4.19078	8.87685	0.4721	-1.08283	0.00025	TRUE	ENSG00000275993	CH507-42P11.8	salt inducible kinase 1B (putative) [Source:HGNC Symbol
TCONS_00023196	1.80309	3.90854	0.4613	-1.11616	0.00345	TRUE	ENSG00000156502	SUPV3L1	Suv3 like RNA helicase [Source:HGNC Symbol
ENST00000459255	2630.69	5854.24	0.4494	-1.15404	0.0002	TRUE	ENSG00000239002	SCARNA10	small Cajal body-specific RNA 10 [Source:HGNC Symbol
ENST00000221804	18.0602	41.6905	0.4332	-1.20691	0.0029	TRUE	ENSG00000105205	CLC	Charcot-Leyden crystal galectin [Source:HGNC Symbol
TCONS_00099035	0.752961	1.76037	0.4277	-1.22523	0.00185	TRUE	ENSG00000081913	PHLPP1	PH domain and leucine rich repeat protein phosphatase 1 [Source:HGNC Symbol
ENST00000307365	15.9259	38.5405	0.4132	-1275	0.0001	TRUE	ENSG00000168209	DDIT4	DNA damage inducible transcript 4 [Source:HGNC Symbol
TCONS_00059631	1.22035	2.98448	0.4089	-1.29019	0.00055	TRUE	ENSG00000139832	RAB20	RAB20
TCONS_00177917	1.18792	2.91678	0.4073	-1.29594	0.0006	TRUE	ENSG00000113070	HBEGF	heparin binding EGF like growth factor [Source:HGNC Symbol
TCONS_00074579	0.36349	0.910897	0.3990	-1.32537	0.0043	TRUE	ENSG00000138623	SEMA7A	semaphorin 7A (John Milton Hagen blood group) [Source:HGNC Symbol
TCONS_00024952	1.70084	4.43292	0.3837	-1.38201	0.0024	TRUE	ENSG00000138166	DUSP5	dual specificity phosphatase 5 [Source:HGNC Symbol
ENST00000366488	0.789796	2.1365	0.3697	-1.4357	0.0023	TRUE	ENSG00000169224	GCSAML	germinal center associated signaling and motility like [Source:HGNC Symbol
TCONS_00184898	0.843042	2.30068	0.3664	-1.44839	0.00135	TRUE	ENSG00000120278	PLEKHG1	pleckstrin homology and RhoGEF domain containing G1 [Source:HGNC Symbol
TCONS_00136907	103702	283808	0.3654	-1.45247	0.00135	TRUE	XLOC_062239	-	-
TCONS_00042194	0.149547	0.420787	0.3554	-1.49249	0.00455	TRUE	XLOC_020421	LORF1	LINE-1 retrotransposable element ORF1 protein
ENST00000341105	3.86062	10.8703	0.3552	-1.49348	0.00025	TRUE	ENSG00000179348	GATA2	GATA binding protein 2 [Source:HGNC Symbol
ENST00000296046	1.01311	2.91699	0.3473	-1.52569	0.00325	TRUE	ENSG00000163751	CPA3	carboxypeptidase A3 [Source:HGNC Symbol
TCONS_00085016	1.05249	3.07502	0.3423	-1.54679	0.0032	TRUE	ENSG00000103257	SLC7A5	solute carrier family 7 member 5 [Source:HGNC Symbol
TCONS_00185111	2.4329	7.21395	0.3372	-1.56811	5e-05	TRUE	ENSG00000130340	SNX9	sorting nexin 9 [Source:HGNC Symbol
TCONS_00160615	0.262762	0.796231	0.3300	-1.59943	0.0007	TRUE	ENSG00000250696	RP11-704M14.1	novel transcript
TCONS_00099603	0.644401	1.96221	0.3284	-1.60645	0.00325	TRUE	ENSG00000176105	YES1	YES proto-oncogene 1
TCONS_00085011	0.402515	1.24188	0.3241	-1.62541	0.0049	TRUE	ENSG00000103257	SLC7A5	solute carrier family 7 member 5 [Source:HGNC Symbol
TCONS_00212449	174184	554246	0.3143	-1.66991	5e-05	TRUE	ENSG00000265735	RN7SL5P	RNA
ENST00000581458	205441	722265	0.2844	-1.8138	0.0015	TRUE	ENSG00000265735	RN7SL5P	RNA
TCONS_00208342	0.326069	1.21083	0.2693	-1.89275	0.0003	TRUE	ENSG00000120875	DUSP4	dual specificity phosphatase 4 [Source:HGNC Symbol
TCONS_00073295	0.631105	2.41355	0.2615	-1.93521	0.0043	TRUE	ENSG00000140287	HDC	histidine decarboxylase [Source:HGNC Symbol
TCONS_00160829	0.35748	1.37867	0.2593	-1.94734	0.0006	TRUE	ENSG00000109321	AREG	amphiregulin [Source:HGNC Symbol
TCONS_00120731	0.551167	2.32414	0.2371	-2.07613	0.00305	TRUE	ENSG00000162972	C2orf47	matrix AAA peptidase interacting protein 1 [Source:HGNC Symbol
ENST00000402676	0.202942	0.906921	0.2238	-2.15991	0.00145	TRUE	ENSG00000131016	AKAP12	A-kinase anchoring protein 12 [Source:HGNC Symbol
TCONS_00036836	0.973882	4.49006	0.2169	-2.20492	5e-05	TRUE	ENSG00000184545	DUSP8	dual specificity phosphatase 8 [Source:HGNC Symbol
TCONS_00052630	0.161041	0.809688	0.1989	-2.32994	0.00015	TRUE	ENSG00000257156	RP11-13A1.3	novel transcript
ENST00000378814	0.570631	3.11451	0.1832	-2.44838	0.004	TRUE	ENSG00000137177	KIF13A	kinesin family member 13A [Source:HGNC Symbol
ENST00000620612	0.595124	4.68108	0.1271	-2.97558	0.0028	TRUE	ENSG00000273136	NBPF26	NBPF member 26 [Source:HGNC Symbol
TCONS_00080463	0.0455253	0.366849	0.1241	-3.01045	0.0016	TRUE	XLOC_038180	UTY	Histone demethylase UTY
ENST00000446912	0.334486	5.56947	0.0601	-4.05752	0.00305	TRUE	ENSG00000233013	FAM157B	family with sequence similarity 157 member B [Source:HGNC Symbol
TCONS_00139487	2.24479	4816	0.0005	-1.10126	0.00035	TRUE	ENSG00000173276	ZBTB21	zinc finger and BTB domain containing 21 [Source:HGNC Symbol
ENST00000528600	54.5021	153841	0.0004	-1.49705	0.0016	TRUE	ENSG00000198851	CD3E	CD3e molecule [Source:HGNC Symbol
ENST00000397806	48.7724	112571	0.0004	-1.20669	0.0006	TRUE	ENSG00000188536	HBA2	hemoglobin subunit alpha 2 [Source:HGNC Symbol
ENST00000228306	35.6213	467086	0.0001	-3.71287	0.00105	TRUE	ENSG00000089157	RPLP0	ribosomal protein lateral stalk subunit P0 [Source:HGNC Symbol
ENST00000438113	0	1.03427	0.0000	-inf	0.0023	TRUE	ENSG00000235271	LINC01422	long intergenic non-protein coding RNA 1422 [Source:NCBI gene
ENST00000327891	0	1.35193	0.0000	-inf	5e-05	TRUE	ENSG00000255883	RP11-79P5.10	FUN14 domain containing 2 pseudogene 1 [Source:HGNC Symbol
ENST00000417888	2.11229	0	inf	inf	0.0036	TRUE	ENSG00000243289	CTGLF8P	ArfGAP with GTPase domain
ENST00000378779	0.57862	0	inf	inf	0.0036	TRUE	ENSG00000205106	DKFZp779M0652	uncharacterized DKFZp779M0652 [Source:NCBI gene
ENST00000510138	5.05117	0	inf	inf	5e-05	TRUE	ENSG00000215630	GUSBP9	glucuronidase
ENST00000419995	1.69001	0	inf	inf	5e-05	TRUE	ENSG00000232060	SLC4A1APP1	solute carrier family 4 member 1 adaptor protein pseudogene 1 [Source:HGNC Symbol
TCONS_00227129	7.7295	0	inf	inf	0.00025	TRUE	ENSG00000229807	XIST	X inactive specific transcript [Source:HGNC Symbol

## Sheet: FM4_Post_vs_Pre
Supplementary Table S4.Individual differentially expressed genes for FM4
Transcript	FM4_Post.value	FM4_Pre.value	Foldchange (Post/Pre)	log2foldchange	pvalue	significance	gene_id	gene_name	gene_description
TCONS_00004134	0.945171	0.145787	6.4832	2.69671	0.00275	TRUE	XLOC_001803	YS049	Zinc finger protein ENSP00000375192
TCONS_00139015	3.39044	0.663096	5.1130	2.35419	0.00195	TRUE	XLOC_063319	GVQW1	Protein GVQW1
TCONS_00021083	1.18106	0.251578	4.6946	2.23101	0.0015	TRUE	XLOC_010215	CP089	UPF0764 protein C16orf89
TCONS_00012072	1.23865	0.287038	4.3153	2.10946	0.0007	TRUE	ENSG00000261326	LINC01355	long intergenic non-protein coding RNA 1355 [Source:HGNC Symbol
ENST00000500989	45757	13.8932	3293.4817	1.71961	0.00115	TRUE	ENSG00000245164	LINC00861	long intergenic non-protein coding RNA 861 [Source:HGNC Symbol
TCONS_00002018	26095	8.58777	3038.6235	1.60342	0.0003	TRUE	ENSG00000229388	RP11-442N24__B.1	long intergenic non-protein coding RNA 1715 [Source:HGNC Symbol
ENST00000239938	22905	75.7287	302.4613	-1.72518	0.0003	TRUE	ENSG00000120738	EGR1	early growth response 1 [Source:HGNC Symbol
TCONS_00000620	6.68152	1.78933	3.7341	1.90076	0.00095	TRUE	XLOC_000258	CN165	Putative uncharacterized protein encoded by LINC00596
TCONS_00003526	0.77309	0.207461	3.7264	1.89779	0.005	TRUE	ENSG00000162398	C1orf177	lymphocyte expansion molecule [Source:HGNC Symbol
TCONS_00197729	0.955703	0.275422	3.4700	1.79492	0.00155	TRUE	ENSG00000228334	AC024028.1	novel transcript
TCONS_00144955	0.667301	0.195936	3.4057	1.76795	0.0035	TRUE	ENSG00000156959	LHFPL4	LHFPL tetraspan subfamily member 4 [Source:HGNC Symbol
TCONS_00193897	1.70846	0.503283	3.3946	1.76326	0.00285	TRUE	ENSG00000235475	LINC01372	-
TCONS_00004848	3.17756	0.964499	3.2945	1.72007	0.00485	TRUE	ENSG00000122435	TRMT13	tRNA methyltransferase 13 homolog [Source:HGNC Symbol
TCONS_00034693	1.4369	0.446282	3.2197	1.68694	0.00425	TRUE	ENSG00000246067	RAB30-AS1	RAB30 antisense RNA 1 (head to head) [Source:HGNC Symbol
TCONS_00141259	1.08806	0.362802	2.9990	1.58451	0.00405	TRUE	XLOC_064315	UTY	Histone demethylase UTY
TCONS_00055517	1.53064	0.511585	2.9920	1.58109	0.00345	TRUE	ENSG00000133111	RFXAP	regulatory factor X associated protein [Source:HGNC Symbol
TCONS_00043476	7.0702	2.42563	2.9148	1.54339	0.0043	TRUE	ENSG00000172322	CLEC12A	C-type lectin domain family 12 member A [Source:HGNC Symbol
TCONS_00056398	1.89111	0.649113	2.9134	1.54269	0.00015	TRUE	ENSG00000206617	RNY1P5	RNA
TCONS_00095301	106425	36712	2.8989	1.53551	0.00065	TRUE	ENSG00000121101	TEX14	testis expressed 14
TCONS_00005030	0.721085	0.250511	2.8785	1.5253	0.0022	TRUE	ENSG00000226822	RP11-356N1.2	novel transcript
TCONS_00016231	64.4688	22.5454	2.8595	1.51577	0.0002	TRUE	ENSG00000275538	RNVU1-19	RNA
TCONS_00172291	2.37207	0.853197	2.7802	1.47519	0.00245	TRUE	ENSG00000272255	CTD-3224K15.3	novel transcript
TCONS_00009936	3.02148	1.10559	2.7329	1.45044	0.0039	TRUE	ENSG00000231563	RP11-245P10.4	novel transcript
TCONS_00017651	6.81995	2.53043	2.6952	1.43038	0.0028	TRUE	ENSG00000132704	FCRL2	Fc receptor like 2 [Source:HGNC Symbol
ENST00000618589	356571	133365	2.6736	1.41881	0.00125	TRUE	ENSG00000276216	CH17-373J23.1	novel transcript
TCONS_00043385	6.74004	2.5704	2.6222	1.39076	0.0029	TRUE	XLOC_020939	LORF2	LINE-1 retrotransposable element ORF2 protein
ENST00000624705	78.4794	30.1024	2.6071	1.38244	0.0007	TRUE	ENSG00000279602	CTD-3014M21.1	TEC
TCONS_00003573	1.5627	0.617433	2.5310	1.33969	0.0022	TRUE	ENSG00000272226	RP11-63G10.3	novel transcript
TCONS_00186812	2.98806	1.18728	2.5167	1.33154	0.0036	TRUE	ENSG00000214894	LINC00243	long intergenic non-protein coding RNA 243 [Source:HGNC Symbol
TCONS_00006015	17.4087	6.96677	2.4988	1.32125	0.0042	TRUE	ENSG00000273768	U1	-
ENST00000614051	89.0857	6.98242	12.7586	3.6734	0.0035	TRUE	ENSG00000277632	CCL3	C-C motif chemokine ligand 3 [Source:HGNC Symbol
TCONS_00219379	3.99669	9.93406	0.4023	-1.31358	0.00045	TRUE	ENSG00000165029	ABCA1	ATP binding cassette subfamily A member 1 [Source:HGNC Symbol
ENST00000331569	5.97539	15.1633	0.3941	-1.34348	0.0028	TRUE	ENSG00000183779	ZNF703	zinc finger protein 703 [Source:HGNC Symbol
ENST00000302754	351905	908402	0.3874	-1.36815	0.0019	TRUE	ENSG00000171223	JUNB	JunB proto-oncogene
ENST00000436139	2.83005	8.75693	0.3232	-1.6296	0.0039	TRUE	ENSG00000138670	RASGEF1B	RasGEF domain family member 1B [Source:HGNC Symbol
ENST00000369448	9.93349	31.1654	0.3187	-1.64957	5e-05	TRUE	ENSG00000183508	FAM46C	terminal nucleotidyltransferase 5C [Source:HGNC Symbol
TCONS_00168213	0.442209	1.40389	0.3150	-1.66663	0.003	TRUE	XLOC_077227	CX062	Putative uncharacterized protein encoded by LINC00269
TCONS_00090941	2.83047	9.63781	0.2937	-1.76766	0.00035	TRUE	ENSG00000261888	AC144831.1	novel transcript
ENST00000367029	26.7687	91.6846	0.2920	-1.77613	0.00175	TRUE	ENSG00000123689	G0S2	G0/G1 switch 2 [Source:HGNC Symbol
ENST00000330871	21.4449	77.4002	0.2771	-1.8517	5e-05	TRUE	ENSG00000184557	SOCS3	suppressor of cytokine signaling 3 [Source:HGNC Symbol
ENST00000307365	18.5348	67.3927	0.2750	-1.86236	5e-05	TRUE	ENSG00000168209	DDIT4	DNA damage inducible transcript 4 [Source:HGNC Symbol
ENST00000613488	3.91646	14.3922	0.2721	-1.87767	5e-05	TRUE	ENSG00000275993	CH507-42P11.8	salt inducible kinase 1B (putative) [Source:HGNC Symbol
TCONS_00214611	1.60136	6.22033	0.2574	-1.95769	0.0025	TRUE	ENSG00000119508	NR4A3	nuclear receptor subfamily 4 group A member 3 [Source:HGNC Symbol
TCONS_00039538	1.67683	6.55235	0.2559	-1.96628	0.00465	TRUE	ENSG00000110046	ATG2A	autophagy related 2A [Source:HGNC Symbol
TCONS_00085016	1.99453	8.27177	0.2411	-2.05215	0.00305	TRUE	ENSG00000103257	SLC7A5	solute carrier family 7 member 5 [Source:HGNC Symbol
ENST00000618597	0.968337	4.38339	0.2209	-2.17847	0.00105	TRUE	ENSG00000204099	NEU4	neuraminidase 4 [Source:HGNC Symbol
TCONS_00085011	0.584245	2.78411	0.2098	-2.25257	0.00385	TRUE	ENSG00000103257	SLC7A5	solute carrier family 7 member 5 [Source:HGNC Symbol
TCONS_00214157	0.374298	1.83571	0.2039	-2.29408	0.00145	TRUE	XLOC_101039	-	-
TCONS_00122654	0.771002	3.88599	0.1984	-2.33348	0.00245	TRUE	ENSG00000188389	PDCD1	programmed cell death 1 [Source:HGNC Symbol
TCONS_00128039	2.75403	14.2296	0.1935	-2.36928	0.0012	TRUE	ENSG00000153234	NR4A2	nuclear receptor subfamily 4 group A member 2 [Source:HGNC Symbol
TCONS_00205958	0.152965	0.826495	0.1851	-2.43381	0.001	TRUE	ENSG00000169439	SDC2	syndecan 2 [Source:HGNC Symbol
TCONS_00090944	0.255368	1.38099	0.1849	-2.43505	0.00095	TRUE	XLOC_042180	CX062	Putative uncharacterized protein encoded by LINC00269
TCONS_00049471	0.450231	2.50962	0.1794	-2.47873	0.0008	TRUE	ENSG00000173391	OLR1	oxidized low density lipoprotein receptor 1 [Source:HGNC Symbol
ENST00000242480	1.21138	6.95025	0.1743	-2.52042	0.0031	TRUE	ENSG00000122877	EGR2	early growth response 2 [Source:HGNC Symbol
ENST00000287590	1.59159	10.2138	0.1558	-2.68198	5e-05	TRUE	ENSG00000156966	B3GNT7	UDP-GlcNAc:betaGal beta-1
TCONS_00160829	0.36716	2.63212	0.1395	-2.84174	0.0013	TRUE	ENSG00000109321	AREG	amphiregulin [Source:HGNC Symbol
ENST00000230990	1.98384	14.3556	0.1382	-2.85525	0.00435	TRUE	ENSG00000113070	HBEGF	heparin binding EGF like growth factor [Source:HGNC Symbol
TCONS_00216253	0.135664	1.00174	0.1354	-2.88439	0.0013	TRUE	XLOC_102121	CN165	Putative uncharacterized protein encoded by LINC00596
ENST00000566457	0.249312	1.9127	0.1303	-2.93959	0.0001	TRUE	ENSG00000261026	CTD-3247F14.2	novel transcript
TCONS_00036836	0.700619	6.30688	0.1111	-3.17023	0.0014	TRUE	ENSG00000184545	DUSP8	dual specificity phosphatase 8 [Source:HGNC Symbol
TCONS_00214618	0.452624	8.25957	0.0548	-4.18968	0.00095	TRUE	ENSG00000119508	NR4A3	nuclear receptor subfamily 4 group A member 3 [Source:HGNC Symbol
ENST00000235382	72.9883	206526	0.0004	-1.50059	0.00145	TRUE	ENSG00000116741	RGS2	regulator of G protein signaling 2 [Source:HGNC Symbol
ENST00000241393	73.7504	284165	0.0003	-1.94601	0.00035	TRUE	ENSG00000121966	CXCR4	C-X-C motif chemokine receptor 4 [Source:HGNC Symbol
TCONS_00080500	3.42017	11413	0.0003	-1.73853	0.00035	TRUE	ENSG00000263456	MIR5189	microRNA 5189 [Source:HGNC Symbol
TCONS_00128041	4.06529	13903	0.0003	-1.77396	0.00175	TRUE	ENSG00000153234	NR4A2	nuclear receptor subfamily 4 group A member 2 [Source:HGNC Symbol
TCONS_00121744	0	0.600333	0.0000	-inf	0.0004	TRUE	XLOC_054706	-	-
ENST00000417147	0	2.81655	0.0000	-inf	0.0011	TRUE	ENSG00000233868	AC009302.2	chromosome 12 open reading frame 31 (C12orf31) pseudogene
ENST00000447172	0	1.24823	0.0000	-inf	0.0027	TRUE	ENSG00000228797	FAM207BP	family with sequence similarity 207 member B
ENST00000318749	0	0.455091	0.0000	-inf	0.0027	TRUE	ENSG00000177535	OR2B11	olfactory receptor family 2 subfamily B member 11 [Source:HGNC Symbol
ENST00000408001	0	1.2831	0.0000	-inf	0.0027	TRUE	ENSG00000217130	RP3-375P9.2	ribosomal protein S10 (RPS10) pseudogene
ENST00000606898	0	0.445487	0.0000	-inf	0.00405	TRUE	ENSG00000272094	RP4-665J23.4	novel transcript
ENST00000450819	0	2.29106	0.0000	-inf	0.00405	TRUE	ENSG00000237991	RPL35P1	ribosomal protein L35 pseudogene 1 [Source:HGNC Symbol
TCONS_00218178	1.46141	0	inf	inf	0.00205	TRUE	XLOC_103106	-	-
ENST00000521444	0.668111	0	inf	inf	0.0015	TRUE	ENSG00000254028	AC083843.2	novel transcript
ENST00000275546	0.697095	0	inf	inf	0.00465	TRUE	ENSG00000277125	CH17-264B6.3	PMS2 postmeiotic segregation increased 2 (S. cerevisiae) (PMS2) pseudogene
TCONS_00088959	0.605174	0	inf	inf	0.00305	TRUE	XLOC_041435	CP089	UPF0764 protein C16orf89
TCONS_00176814	0.453237	0	inf	inf	0.00275	TRUE	ENSG00000199786	RNA5SP188	RNA

## Sheet: FM5_Post_vs_Pre
Supplementary Table S4. Individual differentially expressed genes for FM5
Transcript	FM5_Post.value	FM5_Pre.value	Foldchange (Post/Pre)	log2foldchange	pvalue	significance	gene_id	gene_name	gene_description
TCONS_00197803	2.47013	0.376372	6.5630	2.71435	5e-05	TRUE	XLOC_092732	YS049	Zinc finger protein ENSP00000375192
TCONS_00190050	0.480528	0.0838289	5.7322	2.5191	0.00235	TRUE	ENSG00000219699	RP11-325O24.2	transducin (beta)-like 1 X-linked receptor 1 (TBL1XR1) pseudogene
TCONS_00027633	0.553191	0.127522	4.3380	2.11703	0.00255	TRUE	ENSG00000263482	ANTXRLP1	ANTXR like pseudogene 1 [Source:HGNC Symbol
TCONS_00080009	0.460694	0.108288	4.2543	2.08893	0.00465	TRUE	ENSG00000186153	WWOX	WW domain containing oxidoreductase [Source:HGNC Symbol
TCONS_00154848	0.589539	0.139922	4.2133	2.07497	0.0018	TRUE	XLOC_070561	CX062	Putative uncharacterized protein encoded by LINC00269
TCONS_00165321	0.762956	0.183004	4.1691	2.05972	0.0003	TRUE	ENSG00000250030	RP11-584P21.4	CCR4-NOT transcription complex
TCONS_00213227	0.3956	0.0949084	4.1682	2.05943	0.0005	TRUE	XLOC_100487	LORF2	LINE-1 retrotransposable element ORF2 protein
ENST00000261797	5.34205	1.30572	4.0913	2.03255	0.0014	TRUE	ENSG00000070614	NDST1	N-deacetylase and N-sulfotransferase 1 [Source:HGNC Symbol
ENST00000361567	277186	86.0826	3220.0003	1.68706	5e-05	TRUE	ENSG00000198786	MT-ND5	mitochondrially encoded NADH:ubiquinone oxidoreductase core subunit 5 [Source:HGNC Symbol
TCONS_00201336	0.756192	0.197607	3.8267	1.93612	5e-05	TRUE	ENSG00000184903	IMMP2L	inner mitochondrial membrane peptidase subunit 2 [Source:HGNC Symbol
ENST00000242480	10.0181	2.71561	3.6891	1.88326	0.0008	TRUE	ENSG00000122877	EGR2	early growth response 2 [Source:HGNC Symbol
TCONS_00062075	0.585331	0.158698	3.6883	1.88297	0.0006	TRUE	ENSG00000182185	RAD51B	RAD51 paralog B [Source:HGNC Symbol
TCONS_00175403	2.22372	0.636067	3.4960	1.80573	0.00015	TRUE	ENSG00000185305	ARL15	ADP ribosylation factor like GTPase 15 [Source:HGNC Symbol
TCONS_00198117	0.868115	0.263728	3.2917	1.71884	0.00345	TRUE	ENSG00000071189	SNX13	sorting nexin 13 [Source:HGNC Symbol
TCONS_00123492	0.916284	0.280667	3.2647	1.70694	0.0022	TRUE	XLOC_055455	LIN1	LINE-1 reverse transcriptase homolog
TCONS_00043392	2.05264	0.629406	3.2612	1.70542	0.00365	TRUE	ENSG00000245105	A2M-AS1	A2M antisense RNA 1 [Source:HGNC Symbol
TCONS_00223539	0.446637	0.137737	3.2427	1.69719	0.0039	TRUE	ENSG00000231875	RP11-346E8.1	novel pseudogene
TCONS_00062952	0.994714	0.306885	3.2413	1.69658	0.0001	TRUE	ENSG00000258733	CTD-2341M24.1	long intergenic non-protein coding RNA 2328 [Source:HGNC Symbol
TCONS_00056398	0.336261	0.110246	3.0501	1.60885	0.0019	TRUE	ENSG00000206617	RNY1P5	RNA
TCONS_00128062	1.50969	0.49983	3.0204	1.59475	0.00015	TRUE	ENSG00000136541	ERMN	ermin [Source:HGNC Symbol
ENST00000335295	214707	88.0131	2439.4891	1.28658	0.00025	TRUE	ENSG00000244734	HBB	hemoglobin subunit beta [Source:HGNC Symbol
TCONS_00227157	3.06243	1.07091	2.8597	1.51584	0.00015	TRUE	ENSG00000230590	FTX	FTX transcript
TCONS_00046190	0.768238	0.279116	2.7524	1.46069	0.00015	TRUE	ENSG00000255733	IFNG-AS1	IFNG antisense RNA 1 [Source:HGNC Symbol
TCONS_00218574	0.726756	0.268992	2.7018	1.43391	0.0042	TRUE	ENSG00000148057	IDNK	IDNK
TCONS_00165969	3.45652	1.29857	2.6618	1.4124	0.0039	TRUE	ENSG00000163625	WDFY3	WD repeat and FYVE domain containing 3 [Source:HGNC Symbol
ENST00000581458	487221	185212	2.6306	1.3954	0.0046	TRUE	ENSG00000265735	RN7SL5P	RNA
TCONS_00036014	0.273532	0.107119	2.5535	1.35249	0.00425	TRUE	XLOC_017770	LORF2	LINE-1 retrotransposable element ORF2 protein
ENST00000256637	10.3042	4.23392	2.4337	1.28316	0.00075	TRUE	ENSG00000134243	SORT1	sortilin 1 [Source:HGNC Symbol
ENST00000361390	436197	180053	2.4226	1.27656	0.00035	TRUE	ENSG00000198888	MT-ND1	mitochondrially encoded NADH:ubiquinone oxidoreductase core subunit 1 [Source:HGNC Symbol
ENST00000361453	385435	161548	2.3859	1.25453	0.0005	TRUE	ENSG00000198763	MT-ND2	mitochondrially encoded NADH:ubiquinone oxidoreductase core subunit 2 [Source:HGNC Symbol
ENST00000276390	43.7037	19.1396	2.2834	1.19119	0.00335	TRUE	ENSG00000147416	ATP6V1B2	ATPase H+ transporting V1 subunit B2 [Source:HGNC Symbol
TCONS_00004763	1.57515	0.700041	2.2501	1.16998	0.0041	TRUE	ENSG00000117569	PTBP2	polypyrimidine tract binding protein 2 [Source:HGNC Symbol
TCONS_00223486	1.01785	0.457666	2.2240	1.15316	0.0022	TRUE	XLOC_106097	LIN1	LINE-1 reverse transcriptase homolog
ENST00000361227	699983	335957	2.0835	1.05905	0.0035	TRUE	ENSG00000198840	MT-ND3	mitochondrially encoded NADH:ubiquinone oxidoreductase core subunit 3 [Source:HGNC Symbol
TCONS_00019758	3013	15.2021	198.1963	-2335	5e-05	TRUE	ENSG00000143507	DUSP10	dual specificity phosphatase 10 [Source:HGNC Symbol
ENST00000508487	2392	21.4836	111.3407	-3.16695	0.00105	TRUE	ENSG00000081041	CXCL2	C-X-C motif chemokine ligand 2 [Source:HGNC Symbol
TCONS_00028070	4.96642	0.459342	10.8120	3.43457	0.00025	TRUE	ENSG00000122877	EGR2	early growth response 2 [Source:HGNC Symbol
ENST00000376495	33.8683	76.4157	0.4432	-1.17393	0.0044	TRUE	ENSG00000165312	OTUD1	OTU deubiquitinase 1 [Source:HGNC Symbol
ENST00000254998	10.7425	26.1941	0.4101	-1.28592	0.0038	TRUE	ENSG00000132661	NXT1	nuclear transport factor 2 like export factor 1 [Source:HGNC Symbol
TCONS_00091948	7.24102	17.6762	0.4096	-1.28754	0.0008	TRUE	ENSG00000179029	TMEM107	transmembrane protein 107 [Source:HGNC Symbol
TCONS_00219379	1.55918	3.91308	0.3985	-1.32752	0.00015	TRUE	ENSG00000165029	ABCA1	ATP binding cassette subfamily A member 1 [Source:HGNC Symbol
ENST00000373313	31.6103	83.1331	0.3802	-1.39503	5e-05	TRUE	ENSG00000204103	MAFB	MAF bZIP transcription factor B [Source:HGNC Symbol
ENST00000613488	3.20871	8.44637	0.3799	-1.39634	0.0006	TRUE	ENSG00000275993	CH507-42P11.8	salt inducible kinase 1B (putative) [Source:HGNC Symbol
ENST00000331491	42655	119192	0.3579	-1.48251	0.0043	TRUE	ENSG00000183598	HIST2H3D	histone cluster 2 H3 family member d [Source:HGNC Symbol
TCONS_00023701	1.43717	4.26299	0.3371	-1.56863	0.0014	TRUE	ENSG00000108179	PPIF	peptidylprolyl isomerase F [Source:HGNC Symbol
ENST00000237305	16.2644	52.2123	0.3115	-1.68267	0.0046	TRUE	ENSG00000118515	SGK1	serum/glucocorticoid regulated kinase 1 [Source:HGNC Symbol
ENST00000327857	24.4449	81.0013	0.3018	-1.72841	0.0008	TRUE	ENSG00000239839	DEFA3	defensin alpha 3 [Source:HGNC Symbol
ENST00000369167	14.8109	50.3458	0.2942	-1.76521	0.0002	TRUE	ENSG00000203814	HIST2H2BF	histone cluster 2 H2B family member f [Source:HGNC Symbol
TCONS_00160825	0.507941	1.73557	0.2927	-1.77268	0.0002	TRUE	ENSG00000124882	EREG	epiregulin [Source:HGNC Symbol
TCONS_00019744	3.34937	11.5441	0.2901	-1.78519	0.0022	TRUE	ENSG00000143507	DUSP10	dual specificity phosphatase 10 [Source:HGNC Symbol
TCONS_00169364	1.59619	5.70868	0.2796	-1.83852	0.00185	TRUE	XLOC_077868	CN165	Putative uncharacterized protein encoded by LINC00596
TCONS_00186428	9.92951	38.2858	0.2594	-1.94701	0.00445	TRUE	ENSG00000274267	HIST1H3B	histone cluster 1 H3 family member b [Source:HGNC Symbol
ENST00000378474	13.2973	51.3884	0.2588	-1.95031	0.00015	TRUE	ENSG00000165175	MID1IP1	MID1 interacting protein 1 [Source:HGNC Symbol
TCONS_00136907	184983	730693	0.2532	-1.98187	5e-05	TRUE	XLOC_062239	-	-
ENST00000357949	3.84797	15.5645	0.2472	-2.01609	5e-05	TRUE	ENSG00000197019	SERTAD1	SERTA domain containing 1 [Source:HGNC Symbol
ENST00000390305	16.9111	69.6192	0.2429	-2.04151	0.0025	TRUE	ENSG00000211659	IGLV3-25	immunoglobulin lambda variable 3-25 [Source:HGNC Symbol
ENST00000480614	0.897354	3.88443	0.2310	-2.11395	0.00045	TRUE	ENSG00000112715	VEGFA	vascular endothelial growth factor A [Source:HGNC Symbol
TCONS_00048247	4.08317	17.7362	0.2302	-2.11893	0.0039	TRUE	ENSG00000139726	DENR	density regulated re-initiation and release factor [Source:HGNC Symbol
ENST00000406043	1.99091	8.98724	0.2215	-2.17445	0.0008	TRUE	ENSG00000165506	DNAAF2	dynein axonemal assembly factor 2 [Source:HGNC Symbol
ENST00000376112	2.92375	13.9618	0.2094	-2.25559	0.00215	TRUE	ENSG00000125968	ID1	inhibitor of DNA binding 1
TCONS_00098964	3.91073	19.0829	0.2049	-2.28677	5e-05	TRUE	ENSG00000141682	PMAIP1	phorbol-12-myristate-13-acetate-induced protein 1 [Source:HGNC Symbol
ENST00000602540	1.3467	6.77444	0.1988	-2.33068	5e-05	TRUE	ENSG00000139289	PHLDA1	pleckstrin homology like domain family A member 1 [Source:HGNC Symbol
TCONS_00109651	2.85763	14.4402	0.1979	-2.3372	0.0008	TRUE	ENSG00000267519	CTD-3252C9.4	novel transcript
ENST00000311922	11.8068	60.0304	0.1967	-2.34608	5e-05	TRUE	ENSG00000173334	TRIB1	tribbles pseudokinase 1 [Source:HGNC Symbol
TCONS_00062657	2.16205	11.6104	0.1862	-2.42494	5e-05	TRUE	ENSG00000258820	RP11-293M10.2	novel transcript
ENST00000272233	89957	483944	0.1859	-2.42753	0.0001	TRUE	ENSG00000143878	RHOB	ras homolog family member B [Source:HGNC Symbol
TCONS_00050023	0.955983	5.15195	0.1856	-2.43006	0.0004	TRUE	ENSG00000278743	RP11-707G18.1	novel transcript
TCONS_00008330	4.72393	26.6277	0.1774	-2.49487	5e-05	TRUE	ENSG00000090104	RGS1	regulator of G protein signaling 1 [Source:HGNC Symbol
TCONS_00136482	0.400501	2.25949	0.1773	-2.49612	5e-05	TRUE	ENSG00000124225	PMEPA1	prostate transmembrane protein
ENST00000449264	9.39643	55.33	0.1698	-2.55788	5e-05	TRUE	ENSG00000232810	TNF	tumor necrosis factor [Source:HGNC Symbol
TCONS_00212705	2.19371	13.2128	0.1660	-2.59049	0.002	TRUE	ENSG00000086061	DNAJA1	DnaJ heat shock protein family (Hsp40) member A1 [Source:HGNC Symbol
ENST00000316660	8.15891	50.0827	0.1629	-2.61786	5e-05	TRUE	ENSG00000141682	PMAIP1	phorbol-12-myristate-13-acetate-induced protein 1 [Source:HGNC Symbol
TCONS_00219429	8.09812	49.7883	0.1627	-2.62015	5e-05	TRUE	ENSG00000136826	KLF4	Kruppel like factor 4 [Source:HGNC Symbol
TCONS_00197112	0.312003	1.92945	0.1617	-2.62856	0.0039	TRUE	ENSG00000164867	NOS3	nitric oxide synthase 3 [Source:HGNC Symbol
ENST00000602507	1.32413	8.28549	0.1598	-2.64554	0.0013	TRUE	ENSG00000270069	MIR222HG	miR222/221 cluster host gene [Source:HGNC Symbol
ENST00000488545	2.28458	16.0095	0.1427	-2.80893	0.0007	TRUE	ENSG00000241163	LINC00877	long intergenic non-protein coding RNA 877 [Source:HGNC Symbol
ENST00000380876	0.459456	3.34602	0.1373	-2.86445	0.0015	TRUE	ENSG00000205609	EIF3CL	eukaryotic translation initiation factor 3 subunit C like [Source:HGNC Symbol
TCONS_00016338	1.20648	9.02331	0.1337	-2.90286	0.0012	TRUE	ENSG00000277918	U1	-
ENST00000244869	0.830307	6.37545	0.1302	-2.94081	0.0037	TRUE	ENSG00000124882	EREG	epiregulin [Source:HGNC Symbol
TCONS_00059401	0.166605	1.33748	0.1246	-3.00501	0.0012	TRUE	XLOC_028768	CX062	Putative uncharacterized protein encoded by LINC00269
ENST00000390543	9.76409	78.6395	0.1242	-3.0097	0.00085	TRUE	ENSG00000211892	IGHG4	immunoglobulin heavy constant gamma 4 (G4m marker) [Source:HGNC Symbol
ENST00000328880	1.44429	11.8982	0.1214	-3.04231	0.00075	TRUE	ENSG00000182782	HCAR2	hydroxycarboxylic acid receptor 2 [Source:HGNC Symbol
TCONS_00220483	0.194531	1.81113	0.1074	-3.21882	0.0014	TRUE	XLOC_104392	CX062	Putative uncharacterized protein encoded by LINC00269
TCONS_00123833	0.141638	1.35267	0.1047	-3.25553	0.00055	TRUE	ENSG00000233862	AC016907.3	novel transcript
ENST00000270162	0.13545	1.29446	0.1046	-3.25652	0.003	TRUE	ENSG00000142178	SIK1	salt inducible kinase 1 [Source:HGNC Symbol
ENST00000528880	1.71341	16.7824	0.1021	-3292	5e-05	TRUE	ENSG00000255398	HCAR3	hydroxycarboxylic acid receptor 3 [Source:HGNC Symbol
TCONS_00055635	3.62215	41.4551	0.0874	-3.51663	5e-05	TRUE	ENSG00000102760	RGCC	regulator of cell cycle [Source:HGNC Symbol
ENST00000492118	0.824474	9.81221	0.0840	-3.57303	5e-05	TRUE	ENSG00000162772	ATF3	activating transcription factor 3 [Source:HGNC Symbol
TCONS_00053819	0.580788	6.94168	0.0837	-3.5792	5e-05	TRUE	ENSG00000258102	MAP1LC3B2	microtubule associated protein 1 light chain 3 beta 2 [Source:HGNC Symbol
TCONS_00139015	0.752352	9.44858	0.0796	-3.65062	5e-05	TRUE	XLOC_063319	GVQW1	Protein GVQW1
TCONS_00103087	0.172273	3.06411	0.0562	-4.1527	0.00075	TRUE	ENSG00000187556	NANOS3	nanos C2HC-type zinc finger 3 [Source:HGNC Symbol
TCONS_00021083	0.139205	3.14168	0.0443	-4.49626	5e-05	TRUE	XLOC_010215	CP089	UPF0764 protein C16orf89
ENST00000341491	1.01904	38.2219	0.0267	-5.22912	0.00285	TRUE	ENSG00000162772	ATF3	activating transcription factor 3 [Source:HGNC Symbol
ENST00000375650	1.58508	361.19	0.0044	-7.83205	5e-05	TRUE	ENSG00000204388	HSPA1B	heat shock protein family A (Hsp70) member 1B [Source:HGNC Symbol
TCONS_00095301	61.4921	128192	0.0005	-1.05983	0.00295	TRUE	ENSG00000121101	TEX14	testis expressed 14
ENST00000367188	36.3846	102779	0.0004	-1.49814	0.0019	TRUE	ENSG00000158615	PPP1R15B	protein phosphatase 1 regulatory subunit 15B [Source:HGNC Symbol
ENST00000273153	27.9264	110628	0.0003	-1.98602	5e-05	TRUE	ENSG00000144655	CSRNP1	cysteine and serine rich nuclear protein 1 [Source:HGNC Symbol
ENST00000254322	83.4914	314994	0.0003	-1.91562	0.00145	TRUE	ENSG00000132002	DNAJB1	DnaJ heat shock protein family (Hsp40) member B1 [Source:HGNC Symbol
ENST00000215631	41.2142	122644	0.0003	-1.57326	5e-05	TRUE	ENSG00000099860	GADD45B	growth arrest and DNA damage inducible beta [Source:HGNC Symbol
ENST00000244741	25.5701	112215	0.0002	-2.13374	5e-05	TRUE	ENSG00000124762	CDKN1A	cyclin dependent kinase inhibitor 1A [Source:HGNC Symbol
TCONS_00109648	5.64469	25702	0.0002	-2.18691	0.0032	TRUE	ENSG00000267519	CTD-3252C9.4	novel transcript
ENST00000259874	34.3129	161728	0.0002	-2.23675	5e-05	TRUE	ENSG00000137331	IER3	immediate early response 3 [Source:HGNC Symbol
ENST00000367577	23.0533	107848	0.0002	-2.22594	5e-05	TRUE	ENSG00000162783	IER5	immediate early response 5 [Source:HGNC Symbol
ENST00000307407	50.4008	415652	0.0001	-3.04386	5e-05	TRUE	ENSG00000169429	CXCL8	C-X-C motif chemokine ligand 8 [Source:HGNC Symbol
ENST00000375651	15.7793	147191	0.0001	-3.22158	5e-05	TRUE	ENSG00000204389	HSPA1A	heat shock protein family A (Hsp70) member 1A [Source:HGNC Symbol
ENST00000374672	16.6528	127367	0.0001	-2.93516	0.0041	TRUE	ENSG00000136826	KLF4	Kruppel like factor 4 [Source:HGNC Symbol
ENST00000200453	63.6538	644595	0.0001	-3.34007	5e-05	TRUE	ENSG00000087074	PPP1R15A	protein phosphatase 1 regulatory subunit 15A [Source:HGNC Symbol
ENST00000367459	7.88244	133048	0.0001	-4.07716	0.0009	TRUE	ENSG00000090104	RGS1	regulator of G protein signaling 1 [Source:HGNC Symbol
ENST00000510551	0	0.902183	0.0000	-inf	5e-05	TRUE	ENSG00000249241	AC195454.1	long intergenic non-protein coding RNA 2265 [Source:HGNC Symbol
ENST00000508832	0	68.9178	0.0000	-inf	0.0005	TRUE	ENSG00000251562	MALAT1	metastasis associated lung adenocarcinoma transcript 1 [Source:HGNC Symbol
TCONS_00065679	0	0.505491	0.0000	-inf	0.0039	TRUE	XLOC_031724	OR1FC	Olfactory receptor 1F12
ENST00000492799	0	5.92498	0.0000	-inf	0.00195	TRUE	ENSG00000240457	RN7SL472P	RNA
ENST00000569473	0	0.278275	0.0000	-inf	0.00165	TRUE	ENSG00000261441	RP11-217B1.2	novel transcript
ENST00000333674	0	0.752495	0.0000	-inf	0.0012	TRUE	ENSG00000174384	RP11-313P13.4	PMS1 homolog 2
ENST00000521101	0	0.951843	0.0000	-inf	0.001	TRUE	ENSG00000253632	RP11-486M23.1	novel transcript
ENST00000518047	19666	0	inf	inf	0.00025	TRUE	ENSG00000131504	DIAPH1	diaphanous related formin 1 [Source:HGNC Symbol
TCONS_00175024	14.8724	0	inf	inf	0.0008	TRUE	ENSG00000082074	FYB	FYN binding protein 1 [Source:HGNC Symbol
TCONS_00055630	0.908032	0	inf	inf	0.0001	TRUE	ENSG00000102760	RGCC	regulator of cell cycle [Source:HGNC Symbol
ENST00000603766	1.04559	0	inf	inf	0.0016	TRUE	ENSG00000270750	RP11-461L13.3	-

## Sheet: FM6_Post_vs_Pre
Supplementary Table S4. Individual differentially expressed genes for FM6
Transcript	FM6_Post.value	FM6_Pre.value	Foldchange (Post/Pre)	log2foldchange	pvalue	significance	gene_id	gene_name	gene_description
TCONS_00136907	491892	99648	4.9363	2.30343	5e-05	TRUE	XLOC_062239	-	-
TCONS_00067581	0.462412	0.0949362	4.8708	2.28415	0.0005	TRUE	XLOC_032717	LORF2	LINE-1 retrotransposable element ORF2 protein
ENST00000329516	0.744343	0.16412	4.5354	2.18121	0.00365	TRUE	ENSG00000183054	RGPD6	RANBP2-like and GRIP domain containing 6 [Source:HGNC Symbol
ENST00000509311	3.92013	0.907197	4.3211	2.11141	0.00075	TRUE	ENSG00000206127	GOLGA8O	golgin A8 family member O [Source:HGNC Symbol
ENST00000306384	24008	62.8351	382.0794	-1.38806	0.0014	TRUE	ENSG00000168899	VAMP5	vesicle associated membrane protein 5 [Source:HGNC Symbol
TCONS_00147725	1.37088	0.376661	3.6396	1.86376	0.0013	TRUE	ENSG00000214552	COPS8P2	COP9 signalosome subunit 8 pseudogene 2 [Source:HGNC Symbol
TCONS_00129453	0.524967	0.154508	3.3977	1.76455	0.00455	TRUE	ENSG00000224099	AC064834.1	novel transcript
TCONS_00175281	0.402159	0.137551	2.9237	1.54779	0.00255	TRUE	XLOC_080891	LORF2	LINE-1 retrotransposable element ORF2 protein
TCONS_00041987	2.98507	1.04557	2.8550	1.51348	0.0039	TRUE	ENSG00000160588	MPZL3	myelin protein zero like 3 [Source:HGNC Symbol
TCONS_00046190	1.71326	0.614842	2.7865	1.47845	0.0005	TRUE	ENSG00000255733	IFNG-AS1	IFNG antisense RNA 1 [Source:HGNC Symbol
TCONS_00114416	0.858887	0.314071	2.7347	1.45138	0.00285	TRUE	XLOC_051291	LORF2	LINE-1 retrotransposable element ORF2 protein
TCONS_00201336	2.19494	0.814911	2.6935	1.42947	0.00215	TRUE	ENSG00000184903	IMMP2L	inner mitochondrial membrane peptidase subunit 2 [Source:HGNC Symbol
TCONS_00114091	0.549612	0.212063	2.5917	1.37392	0.0013	TRUE	ENSG00000223145	RN7SKP112	RNA
TCONS_00213227	0.845535	0.338203	2.5001	1.32198	0.00195	TRUE	XLOC_100487	LORF2	LINE-1 retrotransposable element ORF2 protein
TCONS_00087325	2.12789	0.861051	2.4713	1.30525	0.0033	TRUE	ENSG00000274341	RP11-227G15.10	novel transcript
TCONS_00190995	0.373182	0.151017	2.4711	1.30517	0.00125	TRUE	ENSG00000221456	MIR1202	microRNA 1202 [Source:HGNC Symbol
TCONS_00044540	1.0331	0.437895	2.3592	1.23833	0.00415	TRUE	ENSG00000265029	AC076972.1	-
TCONS_00148483	0.944466	0.410558	2.3004	1.20191	0.00325	TRUE	ENSG00000271249	RP11-424I3.1	DIM1 dimethyladenosine transferase 1 homolog pseudogene 1 [Source:HGNC Symbol
TCONS_00159824	0.79002	0.344777	2.2914	1.19622	0.0008	TRUE	XLOC_072864	LORF2	LINE-1 retrotransposable element ORF2 protein
ENST00000397806	266885	1827.94	146.0032	-2.77593	5e-05	TRUE	ENSG00000188536	HBA2	hemoglobin subunit alpha 2 [Source:HGNC Symbol
ENST00000612193	4.36041	0.35421	12.3102	3.62179	0.00495	TRUE	ENSG00000275882	IKBKGP1	inhibitor of nuclear factor kappa B kinase subunit gamma pseudogene 1 [Source:HGNC Symbol
ENST00000369448	30.8427	67.5818	0.4564	-1.13171	0.00415	TRUE	ENSG00000183508	FAM46C	terminal nucleotidyltransferase 5C [Source:HGNC Symbol
ENST00000392619	30.8696	68.3994	0.4513	-1.1478	0.0031	TRUE	ENSG00000186407	CD300E	CD300e molecule [Source:HGNC Symbol
ENST00000355754	16.8273	38.3592	0.4387	-1.18877	0.00395	TRUE	ENSG00000162654	GBP4	guanylate binding protein 4 [Source:HGNC Symbol
ENST00000340990	27.3512	62.3551	0.4386	-1.1889	0.0037	TRUE	ENSG00000159346	ADIPOR1	adiponectin receptor 1 [Source:HGNC Symbol
ENST00000357727	4.28596	9.97711	0.4296	-1219	0.0044	TRUE	ENSG00000146592	CREB5	cAMP responsive element binding protein 5 [Source:HGNC Symbol
ENST00000304748	37.5215	87.8759	0.4270	-1.22775	0.0041	TRUE	ENSG00000171051	FPR1	formyl peptide receptor 1 [Source:HGNC Symbol
ENST00000307637	9.40699	22.4355	0.4193	-1.25398	0.00245	TRUE	ENSG00000171860	C3AR1	complement C3a receptor 1 [Source:HGNC Symbol
TCONS_00107217	6.41092	15.6451	0.4098	-1.28711	0.0048	TRUE	ENSG00000186431	FCAR	Fc fragment of IgA receptor [Source:HGNC Symbol
ENST00000259727	5.74713	14.7005	0.3909	-1.35495	0.0026	TRUE	ENSG00000137198	GMPR	guanosine monophosphate reductase [Source:HGNC Symbol
ENST00000367029	33.4126	86.5232	0.3862	-1.3727	0.00095	TRUE	ENSG00000123689	G0S2	G0/G1 switch 2 [Source:HGNC Symbol
ENST00000289473	40433	106818	0.3785	-1.40155	0.0007	TRUE	ENSG00000158517	NCF1	neutrophil cytosolic factor 1 [Source:HGNC Symbol
ENST00000361729	2.10634	5.61523	0.3751	-1.4146	0.0033	TRUE	ENSG00000007968	E2F2	E2F transcription factor 2 [Source:HGNC Symbol
ENST00000311922	15.4645	42.0035	0.3682	-1.44155	0.00405	TRUE	ENSG00000173334	TRIB1	tribbles pseudokinase 1 [Source:HGNC Symbol
ENST00000361842	16.6163	45.2247	0.3674	-1.44451	0.0003	TRUE	ENSG00000132530	XAF1	XIAP associated factor 1 [Source:HGNC Symbol
ENST00000330714	15.9108	44.5499	0.3571	-1.48542	0.00265	TRUE	ENSG00000183486	MX2	MX dynamin like GTPase 2 [Source:HGNC Symbol
ENST00000269389	22.1237	61.9735	0.3570	-1.48606	0.0007	TRUE	ENSG00000141574	SECTM1	secreted and transmembrane 1 [Source:HGNC Symbol
ENST00000219919	7.40337	21.4806	0.3447	-1.53678	0.0008	TRUE	ENSG00000103569	AQP9	aquaporin 9 [Source:HGNC Symbol
TCONS_00095301	12.6137	36.8301	0.3425	-1.54589	0.0035	TRUE	ENSG00000121101	TEX14	testis expressed 14
ENST00000368605	10.2039	31.6748	0.3221	-1.63422	0.0008	TRUE	ENSG00000188820	FAM26F	calcium homeostasis modulator family member 6 [Source:HGNC Symbol
TCONS_00144713	0.559058	1.74954	0.3195	-1.6459	0.0013	TRUE	ENSG00000272666	CTA-384D8.35	uncharacterized LOC105373098 [Source:NCBI gene
ENST00000296140	16.3702	51.5022	0.3179	-1.65357	0.0001	TRUE	ENSG00000163823	CCR1	C-C motif chemokine receptor 1 [Source:HGNC Symbol
ENST00000347528	1.34852	4.27201	0.3157	-1.66354	0.0035	TRUE	ENSG00000029534	ANK1	ankyrin 1 [Source:HGNC Symbol
ENST00000313624	7.57782	24.3486	0.3112	-1.68398	0.0002	TRUE	ENSG00000133106	EPSTI1	epithelial stromal interaction 1 [Source:HGNC Symbol
ENST00000270162	0.48983	1.57852	0.3103	-1.68822	0.004	TRUE	ENSG00000142178	SIK1	salt inducible kinase 1 [Source:HGNC Symbol
ENST00000380659	2.46979	8.40279	0.2939	-1.76648	0.00025	TRUE	ENSG00000196664	TLR7	toll like receptor 7 [Source:HGNC Symbol
ENST00000228928	17.0539	59.0321	0.2889	-1.7914	0.0045	TRUE	ENSG00000111331	OAS3	2'-5'-oligoadenylate synthetase 3 [Source:HGNC Symbol
ENST00000264350	3.07763	10.7593	0.2860	-1.80569	0.00315	TRUE	ENSG00000138646	HERC5	HECT and RLD domain containing E3 ubiquitin protein ligase 5 [Source:HGNC Symbol
TCONS_00168213	0.293453	1.03347	0.2839	-1.81629	0.0013	TRUE	XLOC_077227	CX062	Putative uncharacterized protein encoded by LINC00269
ENST00000325602	6.49804	23.3139	0.2787	-1.84312	0.00245	TRUE	ENSG00000181631	P2RY13	purinergic receptor P2Y13 [Source:HGNC Symbol
ENST00000307677	10.7684	38.7158	0.2781	-1.84612	0.0023	TRUE	ENSG00000171552	BCL2L1	BCL2 like 1 [Source:HGNC Symbol
ENST00000402322	4.78528	17.5571	0.2726	-1.87538	0.00155	TRUE	ENSG00000173372	C1QA	complement C1q A chain [Source:HGNC Symbol
ENST00000241261	24.1531	89.5775	0.2696	-1.89093	5e-05	TRUE	ENSG00000121858	TNFSF10	TNF superfamily member 10 [Source:HGNC Symbol
ENST00000367468	2.73469	10.1683	0.2689	-1.89463	0.0005	TRUE	ENSG00000073756	PTGS2	prostaglandin-endoperoxide synthase 2 [Source:HGNC Symbol
TCONS_00176449	0.415469	1.5595	0.2664	-1.90827	0.00345	TRUE	ENSG00000248323	LUCAT1	lung cancer associated transcript 1 [Source:HGNC Symbol
ENST00000398598	17.2713	64.8227	0.2664	-1.90813	5e-05	TRUE	ENSG00000157601	MX1	MX dynamin like GTPase 1 [Source:HGNC Symbol
ENST00000606142	17.0101	64.2264	0.2648	-1.91677	0.00015	TRUE	ENSG00000002549	LAP3	leucine aminopeptidase 3 [Source:HGNC Symbol
ENST00000256722	3.34976	12.7017	0.2637	-1.92289	0.00265	TRUE	ENSG00000134326	CMPK2	cytidine/uridine monophosphate kinase 2 [Source:HGNC Symbol
TCONS_00010588	6.11366	23.4968	0.2602	-1.94235	5e-05	TRUE	ENSG00000162722	TRIM58	tripartite motif containing 58 [Source:HGNC Symbol
ENST00000242480	3.43179	13.3185	0.2577	-1.9564	0.0002	TRUE	ENSG00000122877	EGR2	early growth response 2 [Source:HGNC Symbol
TCONS_00104587	0.483784	1.88003	0.2573	-1.95832	0.0038	TRUE	ENSG00000126262	FFAR2	free fatty acid receptor 2 [Source:HGNC Symbol
ENST00000337908	1.77964	6.94206	0.2564	-1.96378	0.00105	TRUE	ENSG00000110079	MS4A4A	membrane spanning 4-domains A4A [Source:HGNC Symbol
ENST00000370747	6.03831	23.6844	0.2549	-1.97172	0.00225	TRUE	ENSG00000137965	IFI44	interferon induced protein 44 [Source:HGNC Symbol
TCONS_00099110	0.132224	0.519629	0.2545	-1.9745	0.0049	TRUE	ENSG00000197632	SERPINB2	serpin family B member 2 [Source:HGNC Symbol
ENST00000361264	11.6987	48.0329	0.2436	-2.03767	5e-05	TRUE	ENSG00000198876	DCAF12	DDB1 and CUL4 associated factor 12 [Source:HGNC Symbol
TCONS_00062657	1.28472	5.33226	0.2409	-2.05329	0.0005	TRUE	ENSG00000258820	RP11-293M10.2	novel transcript
ENST00000005178	2.18249	9.09587	0.2399	-2.05924	0.0011	TRUE	ENSG00000004799	PDK4	pyruvate dehydrogenase kinase 4 [Source:HGNC Symbol
ENST00000243457	0.320585	1.40087	0.2288	-2.12754	0.00185	TRUE	ENSG00000123700	KCNJ2	potassium voltage-gated channel subfamily J member 2 [Source:HGNC Symbol
ENST00000566457	0.218076	1.02804	0.2121	-2.23699	0.00165	TRUE	ENSG00000261026	CTD-3247F14.2	novel transcript
TCONS_00224992	0.46398	2.20653	0.2103	-2.24964	0.00205	TRUE	ENSG00000130821	SLC6A8	solute carrier family 6 member 8 [Source:HGNC Symbol
ENST00000370473	12.1002	58.2558	0.2077	-2.26737	5e-05	TRUE	ENSG00000117228	GBP1	guanylate binding protein 1 [Source:HGNC Symbol
ENST00000446688	1.77061	9.29598	0.1905	-2.39236	0.0002	TRUE	ENSG00000079308	TNS1	tensin 1 [Source:HGNC Symbol
ENST00000394991	7.06459	37.8331	0.1867	-2.42097	5e-05	TRUE	ENSG00000145335	SNCA	synuclein alpha [Source:HGNC Symbol
ENST00000259456	2.25501	12.2846	0.1836	-2.44565	5e-05	TRUE	ENSG00000136929	HEMGN	hemogen [Source:HGNC Symbol
ENST00000599180	1.14467	6.30708	0.1815	-2.46204	0.0038	TRUE	ENSG00000126262	FFAR2	free fatty acid receptor 2 [Source:HGNC Symbol
ENST00000431368	0.9533	5.27994	0.1806	-2.46952	0.00315	TRUE	ENSG00000184792	OSBP2	oxysterol binding protein 2 [Source:HGNC Symbol
ENST00000518881	5.88261	33.0646	0.1779	-2.49076	0.00015	TRUE	ENSG00000147454	SLC25A37	solute carrier family 25 member 37 [Source:HGNC Symbol
ENST00000314933	3.35425	19.0754	0.1758	-2.50765	5e-05	TRUE	ENSG00000173369	C1QB	complement C1q B chain [Source:HGNC Symbol
ENST00000299367	0.960393	5.76797	0.1665	-2.58637	0.001	TRUE	ENSG00000166278	C2	complement C2 [Source:HGNC Symbol
TCONS_00110915	0.130565	0.93412	0.1398	-2.83884	0.0028	TRUE	ENSG00000232680	AC002511.3	novel transcript
ENST00000400335	0.178633	1.68667	0.1059	-3.2391	0.0001	TRUE	ENSG00000183762	KREMEN1	kringle containing transmembrane protein 1 [Source:HGNC Symbol
ENST00000335295	1430.51	13824.7	0.1035	-3.27265	5e-05	TRUE	ENSG00000244734	HBB	hemoglobin subunit beta [Source:HGNC Symbol
TCONS_00134499	0.311047	3.19938	0.0972	-3.36259	0.00295	TRUE	ENSG00000088827	SIGLEC1	sialic acid binding Ig like lectin 1 [Source:HGNC Symbol
ENST00000378324	0.908553	10.0535	0.0904	-3.46799	0.00075	TRUE	ENSG00000149131	SERPING1	serpin family G member 1 [Source:HGNC Symbol
ENST00000356815	2.14714	24.0566	0.0893	-3.48594	0.00075	TRUE	ENSG00000206177	HBM	hemoglobin subunit mu [Source:HGNC Symbol
TCONS_00012581	0.362059	4.76993	0.0759	-3.71967	5e-05	TRUE	ENSG00000162512	SDC3	syndecan 3 [Source:HGNC Symbol
ENST00000380299	2.17963	29.2848	0.0744	-3.74799	5e-05	TRUE	ENSG00000223609	HBD	hemoglobin subunit delta [Source:HGNC Symbol
ENST00000368868	0.948657	13.0813	0.0725	-3.78547	5e-05	TRUE	ENSG00000143416	SELENBP1	selenium binding protein 1 [Source:HGNC Symbol
ENST00000330807	3.99234	66.5866	0.0600	-4.05992	5e-05	TRUE	ENSG00000158578	ALAS2	5'-aminolevulinate synthase 2 [Source:HGNC Symbol
TCONS_00028854	0.116593	2.00303	0.0582	-4.10263	0.00245	TRUE	ENSG00000152766	ANKRD22	ankyrin repeat domain 22 [Source:HGNC Symbol
ENST00000307407	58.0513	176625	0.0003	-1.60529	0.0004	TRUE	ENSG00000169429	CXCL8	C-X-C motif chemokine ligand 8 [Source:HGNC Symbol
ENST00000239938	48.5776	168611	0.0003	-1.79533	5e-05	TRUE	ENSG00000120738	EGR1	early growth response 1 [Source:HGNC Symbol
ENST00000399808	113.62	448644	0.0003	-1.98136	5e-05	TRUE	ENSG00000142089	IFITM3	interferon induced transmembrane protein 3 [Source:HGNC Symbol
ENST00000379389	33.0974	104489	0.0003	-1.65857	0.00025	TRUE	ENSG00000187608	ISG15	ISG15 ubiquitin-like modifier [Source:HGNC Symbol
ENST00000519973	5.16798	20226	0.0003	-1.96853	0.0014	TRUE	ENSG00000147454	SLC25A37	solute carrier family 25 member 37 [Source:HGNC Symbol
ENST00000358655	26.3505	104071	0.0003	-1.98167	0.00095	TRUE	ENSG00000140105	WARS	tryptophanyl-tRNA synthetase [Source:HGNC Symbol
ENST00000370751	3.05009	15952	0.0002	-2.38681	5e-05	TRUE	ENSG00000137959	IFI44L	interferon induced protein 44 like [Source:HGNC Symbol
ENST00000361157	25.3616	103539	0.0002	-2.02946	5e-05	TRUE	ENSG00000126709	IFI6	interferon alpha inducible protein 6 [Source:HGNC Symbol
ENST00000320868	42.2994	306746	0.0001	-2.85834	5e-05	TRUE	ENSG00000206172	HBA1	hemoglobin subunit alpha 1 [Source:HGNC Symbol
ENST00000382040	1.46741	10171	0.0001	-2.79312	0.0022	TRUE	ENSG00000134321	RSAD2	radical S-adenosyl methionine domain containing 2 [Source:HGNC Symbol
ENST00000262418	2.1583	32228	0.0001	-3.90035	5e-05	TRUE	ENSG00000004939	SLC4A1	solute carrier family 4 member 1 (Diego blood group) [Source:HGNC Symbol
ENST00000467738	0	0.354642	0.0000	-inf	0.001	TRUE	ENSG00000168306	ACOX2	acyl-CoA oxidase 2 [Source:HGNC Symbol
TCONS_00002839	0	0.369516	0.0000	-inf	0.0013	TRUE	ENSG00000164007	CLDN19	claudin 19 [Source:HGNC Symbol
ENST00000606424	0	0.937051	0.0000	-inf	0.00205	TRUE	ENSG00000271849	CTC-332L22.1	novel transcript
TCONS_00103191	0	0.556117	0.0000	-inf	0.00105	TRUE	XLOC_047280	LIN1	LINE-1 reverse transcriptase homolog
ENST00000462517	0	1.23823	0.0000	-inf	0.00105	TRUE	ENSG00000213509	PPIAP16	peptidylprolyl isomerase A pseudogene 16 [Source:HGNC Symbol
ENST00000394836	0	0.366685	0.0000	-inf	5e-05	TRUE	ENSG00000167994	RAB3IL1	RAB3A interacting protein like 1 [Source:HGNC Symbol
ENST00000445695	0	1203	0.0000	-inf	5e-05	TRUE	ENSG00000204778	RP11-15J10.1	COBW domain containing 4 pseudogene [Source:HGNC Symbol
ENST00000544832	0	0.626719	0.0000	-inf	0.0001	TRUE	ENSG00000256723	RP11-167N4.4	family with sequence similarity 91
ENST00000430943	0.364797	0	inf	inf	0.00115	TRUE	ENSG00000224725	CEP57L1P1	centrosomal protein 57 like 1 pseudogene 1 [Source:HGNC Symbol
ENST00000438113	2.05655	0	inf	inf	5e-05	TRUE	ENSG00000235271	LINC01422	long intergenic non-protein coding RNA 1422 [Source:NCBI gene
ENST00000543349	0.84372	0	inf	inf	0.0009	TRUE	ENSG00000229859	PGA3	pepsinogen 3
